1    **The onset and offset of noxious stimuli robustly modulate perceived pain intensity**

2    Benedict J. Alter<sup>1\*</sup>, Mya Sandi Aung<sup>1</sup>, Irina A. Strigo<sup>2</sup>, and Howard L. Fields<sup>3</sup>

3    <sup>1</sup> Department of Anesthesia and Perioperative Care, University of California San Francisco, San Francisco,  
4    California, United States of America

5    <sup>2</sup> San Francisco VA Health Care System & Department of Psychiatry, University of California San  
6    Francisco, San Francisco, California, United States of America

7    <sup>3</sup> Department of Neurology, University of California San Francisco, San Francisco, California, United  
8    States of America

9    \* Corresponding author

10    Email: [alterbj@upmc.edu](mailto:alterbj@upmc.edu) (BA)

11

12

13

14

15

16

17

18

19

20

21

22

23

24

25

26

27

28

29

30

31

32

33

34

## 35 **Abstract**

36 Reported pain intensity depends not only on stimulus intensity but also on previously experienced pain.  
37 A painfully hot temperature applied to the skin evokes a lower subjective pain intensity if immediately  
38 preceded by a higher temperature, a phenomenon called offset analgesia. This is typically evoked using  
39 a three-step noxious heat stimulus. In other clinical and laboratory settings, prior pain experience may  
40 increase pain intensity as well. Therefore, we hypothesized that even small increases in stimulus  
41 intensity within the noxious range would be accompanied by enhanced reported pain intensity. To test  
42 this possibility, we inverted the intensity order of the three-step stimulus, so that the same hot  
43 temperature is immediately preceded by an increase from a transiently lowered temperature. Using  
44 healthy volunteer subjects, we observed a disproportionate increase in pain intensity during the novel,  
45 inverted, three-step stimulus. This disproportionate increase is similar in magnitude to that of offset  
46 analgesia. Control stimuli demonstrate that these changes in pain intensity are distinct from habituation.  
47 The magnitudes of offset analgesia and the disproportionate increase in pain intensity correlate with  
48 each other but not with the absolute noxious stimulus temperature. These observations suggest that the  
49 disproportionate increase in pain intensity represents an “onset hyperalgesia.” Finally, the magnitude of  
50 both offset analgesia and onset hyperalgesia depends on preceding temperature changes. Overall, this  
51 study finds that perceptual enhancement of noxious stimulus change occurs bidirectionally and that this  
52 depends on the intensity and direction of change of the immediately preceding stimulus.

## 53 **Introduction**

54 Controlled psychophysical studies using acute stimuli reveal a consistent relationship between stimulus  
55 intensity and reported subjective pain intensity [1]. This relationship reflects the activity of the  
56 peripheral and central nociceptive transmission pathways that mediate pain perception. However, both

57 clinical and experimental studies have demonstrated that there can be a dramatic dissociation between  
58 subjective pain reports and the intensity of the applied nociceptive input. Reported pain is consistently  
59 and predictably modifiable by prior experience and expectation, such that equivalent noxious input can  
60 yield divergent pain reports when sensory cues associated with lower or higher pain are presented [2,  
61 3]. Placebo analgesia and the increase in pain with nocebo are examples of this process [4, 5].  
62 Importantly, there is a dynamic interaction between the intensity of ongoing pain perception and the  
63 impact of superimposed noxious stimulation [6]. Although much progress has been made in  
64 understanding how learned predictive cues influence subsequent pain perception, less is known about  
65 how changes in nociceptive input can act as predictive cues and dynamically modify the perceptual  
66 impact of subsequent noxious input.

67 In an effort to better understand dynamically changing pain perception, and specifically pain relief,  
68 Coghill and others made a significant advance when they discovered and provided detailed studies of  
69 what they labeled “offset analgesia” [7, 8]. Using a cutaneous thermode they found that when there is  
70 an ongoing stable moderately painful heat stimulus, a one-degree Celsius increase in thermode  
71 temperature for 5 seconds followed by a return to the prior noxious temperature elicits a  
72 disproportionate drop in pain intensity rating compared with a constant stimulus at the initial  
73 temperature – so-called “offset analgesia”. This effect was also observed when the transient increase  
74 and decrease were applied on the contralateral arm consistent with a primarily central nervous system  
75 mechanism for offset analgesia [9]. Functional imaging studies indicate that offset analgesia is mediated  
76 by brainstem pain modulatory circuitry [10-13]. Curiously, although these modulatory circuits are known  
77 to exert bidirectional control over nociceptive transmission, no disproportionately large increase in pain  
78 with the onset of the higher temperature was reported. Subsequently, elegant modeling of pain  
79 intensity with supra-threshold heat stimuli predicted perceptual enhancement of temperature increases  
80 as well as decreases[14], although this was not empirically demonstrated. Increases in radiant heat using

81 infra-red light applied to the skin does elicit increases in pain intensity, but again these were less in  
82 magnitude than temperature decreases[15].

83 To clarify the apparent contradiction between reports of offset analgesia without equivalent  
84 enhancement of temperature increases and the known bidirectional effects of descending modulation,  
85 we re-examined the effect of small changes of stimulus intensity on subsequent pain reports. In the  
86 current study, we report that robust onset hyperalgesia exists, consistent with bidirectional perceptual  
87 modulation dependent upon the direction of change of the immediately preceding noxious stimulus.

## 88 **Materials and Methods**

### 89 **Subjects**

90 35 female and 39 male subjects signed written informed consent for the study, which was approved by  
91 the University of California, San Francisco (UCSF) Institutional Review Board. Subjects were recruited by  
92 public notice, including on-line advertising through Craigslist and paper advertising at UCSF. Inclusion  
93 criteria were healthy subjects aged 18-50 years old. Exclusion criteria included current significant  
94 medical comorbidities requiring frequent medical follow-up, pregnancy, chronic pain, ongoing acute  
95 pain, depression, anxiety, bipolar disorder, psychotic disorder, concurrent analgesic use, concurrent  
96 psychoactive medications (e.g. benzodiazepines, antidepressants), blindness, deafness, non-fluency in  
97 English. For consistency with ongoing studies, exclusion criteria also included inability to undergo  
98 magnetic resonance imaging (MRI) for any reason (e.g. non-compatible implants, claustrophobia).

### 99 **Testing protocol**

100 The study timeline included recruitment and administration of standardized surveys followed by a single  
101 study visit lasting 2-3 hours. During the study visit, subjects completed surveys and then underwent heat  
102 pain threshold testing, heat stimulus calibration, and supra-threshold heat pain testing.

103 The study visit occurred in a research lab located in a clinical building on a hospital campus. A single  
104 office room was used. Experimenters included authors B.A. and S.A. All subjects were monitored using a  
105 3-lead electrocardiogram (ECG) which was in place during testing. Breaks were allowed if the subject  
106 requested them. Subjects were compensated monetarily for their time and travel.

## 107 **Questionnaires**

108 Upon study inclusion, subjects completed electronic (REDCap) or paper surveys. For most subjects,  
109 surveys were done electronically prior to study visit. If the electronic survey was not done or incomplete  
110 on the day of the study visit, a paper survey was done. The survey packet included self-reported basic  
111 demographic information, medical histories, and measures of social status (BSMSS), depression (BDI-II),  
112 anxiety (STAI Y-1 and Y-2), impulsivity (BIS-11) and pain catastrophizing (PCS). The BSMSS generates a  
113 single ordinal score reflecting the respondent's education and occupation as well as the education and  
114 occupation of their parents and spouse[16]. The BDI-II measures cognitive-affective and somatic-  
115 vegetative aspects of depression with excellent psychometric properties across different  
116 populations[17]. The STAI measures both state (Y-1) and trait (Y-2) anxiety, producing an ordinal score  
117 reflecting apprehension, tension, nervousness, and arousal[18, 19]. The PCS measures catastrophic  
118 thinking associated with pain incorporating magnification of pain-related symptoms, rumination about  
119 pain, feelings of helplessness, and pessimism about pain-related outcomes [20]. The BIS-11 measures  
120 attentional, motor, and non-planning impulsiveness [21] which are associated with reward processing  
121 relevant to pain and addiction [22, 23]. After sensory testing outlined below, the STAI Y-2 and the

122 situational pain catastrophizing scale (SPCS), measuring catastrophizing related to a pain experience  
123 [24], were administered.

## 124 **Equipment and pain reporting**

125 Subjects were seated in a comfortable office chair in front of a desk. All heat stimuli were applied with  
126 the Pathway NeuroSensory Analyzer (Medoc; Ramat Yishai, Israel) using an fMRI-compatible, 3x3 cm  
127 ATS thermode. Subjects reported heat pain threshold with a button press using the Pathway Patient  
128 Response Unit. Subjects reported pain intensity in real time using a Computerized Visual Analogue Scale  
129 (COVAS, Medoc) consisting of a 100-mm visual analogue scale anchored by “no pain sensation” on the  
130 left and “most intense pain sensation imaginable” on the right. Subjects positioned a slider on this scale  
131 to reflect their pain intensity rating in that moment. Slider position over time was recorded using Medoc  
132 software.

## 133 **Cutaneous heat stimulation**

134 All heat stimuli were applied to the volar surface of the non-dominant forearm. Three locations were  
135 used for heat stimulation, rotating from proximal to distal back to proximal. The time between heat  
136 stimuli was at least 120 seconds. With site rotation, the time between stimulating the same area of skin  
137 was at least 6 minutes. The thermode was placed on the volar forearm to allow full contact with the skin  
138 without excessive pressure and secured with a Velcro strap. The thermode was held at 32°C between  
139 heat stimuli.

## 140 **Heat pain threshold testing**

141 Heat pain threshold was first determined using the method of limits. From a baseline of 32°C, the  
142 thermode was warmed at a rate of 1.5 C°/sec until subjects reported the transition from heat to pain via

143 button press. The temperature reached was recorded as the heat pain threshold. The language used to  
144 describe the transition was “whenever the sensation changed from heat to pain.” Maximum cutoff  
145 temperature was set to 55 °C. Heat pain thresholds from the three skin locations were averaged. This  
146 temperature was then used for heat stimulus calibration.

## 147 **Heat stimulus calibration**

148 This portion of the protocol established an individually calibrated temperature to elicit a pain rating of  
149 ~50 mm on the COVAS at the end of a 30-second constant heat stimulus. The stimulus started at a  
150 baseline of 32°C, increased at a rate of 1.5 C°/sec, maintained a constant target temperature for 30  
151 seconds, and returned to baseline temperature at a rate of 6 C°/sec. Subjects were asked to rate their  
152 pain on the COVAS in real time during each stimulus. The initial target temperature was chosen based  
153 on heat pain threshold. If the threshold was greater than or equal to 45°C, the initial target temperature  
154 was the heat threshold temperature. With lower thresholds, the initial target temperature was 2 C°  
155 higher than threshold. The stimulus target temperature was increased by 1 C° until pain report was  
156 between 40-60 mm on the COVAS. If pain report was greater than 90 mm, the subsequent stimulus was  
157 adjusted down by 1 C°. Finally, the temperature producing a pain report of ~50 mm on the COVAS was  
158 used for subsequent procedures and is referred to as T1. One C° higher was defined as T2.

## 159 **Supra-threshold heat pain testing and pain intensity curve analysis**

160 Subjects rated pain on the COVAS in response to a series of complex and control supra-threshold stimuli  
161 (Fig 1A). These included the novel Inverted (Inv) stimulus which started at a baseline of 32°C, maintained  
162 at T2 for 5 seconds (t1 period), decreased by 1 C° to T1 for 5 seconds (t2 period), increased by 1 C° (back  
163 to T2) for 20 seconds (t3 period), and returned to baseline (Fig 1A&B). Initial rise rate from baseline was  
164 1.5 C°/sec. Rates of change after achieving T2 were 6 C°/sec. The three-step stimulus typically used to

165 measure offset analgesia was included (3step; rise rate 1.5 C°/sec, T1 for 5 seconds, T2 for 5 seconds, T1  
166 for 20 seconds; rates of change and fall rate 6 C°/sec; Fig 1A&C) as well as a novel two-step stimulus  
167 (2step; rise rate 1.5 C°/sec, 10 seconds at T2, 20 seconds at T1, rates of change and fall rate 6 C°/sec; Fig  
168 1A&D). Constant control stimuli included a simple step to T1 (T1; 30 seconds at T1, rise rate 1.5 C°/sec,  
169 fall rate 6 C°/sec; Fig 1A,C,D) and a simple step to T2 (T2; 30 seconds at T2, rise rate 1.5 C°/sec, fall rate 6  
170 C°/sec; Fig 1A&B).

171 **Fig 1: Experimental design and examples of data extraction. A.** Subjects underwent (1) heat  
172 pain threshold testing, (2) an ascending series of suprathreshold, constant, 30-second,  
173 temperature stimuli to determine an individualized temperature that would elicit a COVAS pain  
174 rating of 50 mm/100 mm, and finally (3) a randomized mixture of suprathreshold, 30-second  
175 temperature stimuli. The mixture included novel complex supra-threshold stimuli (top row) and  
176 control constant stimuli (bottom row) shown. The temperature curves plotted are examples in  
177 which T1 = 45°C. **B.-D.** Examples of continuous pain intensity measured by COVAS and thermode  
178 temperature during complex stimuli with appropriate control stimuli superimposed from a  
179 single subject. Inverted (Inv) data are plotted with the control T2 stimulus data to measure  
180 differences in pain intensity during the *t3* period despite the same thermode temperature (**B.**).  
181 3step (**C.**) and 2step (**D.**) data are plotted with T1 data to measure differences in pain intensity  
182 during the *t3* period despite the same thermode temperature. The dotted arrows labeled “*a*”  
183 depict measured differences between complex and control curves. For example in **B.**, the *a*  
184 arrow shows the difference between the local maximum of the COVAS pain curve during the Inv  
185 stimulus and the pain intensity at the same timepoint during the control T2 stimulus. The “*b*”  
186 arrows depict differences within the complex stimuli between local maxima and minima of the  
187 COVAS pain curves. Differences between complex and control stimuli (*a* arrows) and within-  
188 stimulus changes during complex stimuli (*b* arrows) were extracted for group-level analysis.



189

190 The parameters for the 3-step and constant, simple-step stimuli are similar to previously published  
191 reports investigating offset analgesia[7-9, 25-27]. The Inv and 2-step stimuli are novel stimuli with timing  
192 parameters and temperatures mirroring those of the 3-step stimulus. Temperature order of the Inv  
193 stimulus was manipulated to test whether an increase in temperature after a decrement produced a  
194 disproportionate increase in reported pain intensity. The 2-step stimulus is a modification of the 3-step  
195 stimulus to test whether eliminating the initial period at T1 affected offset analgesia magnitude. The 3-  
196 step was repeated in triplicate. Simple steps and Inv stimuli were repeated in duplicate. One 2-step was  
197 used. The number of replicates was chosen during preliminary testing. As noted above, the heat  
198 stimulus was sequentially rotated between three sites of the forearm. Three stimuli at each site (i.e.  
199 three rounds of three stimuli = 9 stimuli) was found to be feasible and acceptable to preliminary subjects  
200 (data not included). A T1 stimulus replicate was removed from the 9 stimuli and replaced with a 2-step  
201 stimulus. During data analysis, data from the T1 stimulus during the heat calibration procedure was  
202 included as a T1 replicate, allowing for the T1 condition to be done in duplicate. The order of these  
203 stimuli was randomized without replacement to ensure replicate testing using the randomization  
204 function in Excel (Microsoft, Redmond, Washington).

## 205 **Statistical Analysis**

206 Replicate pain intensity curves were averaged within each subject. Since T1 was individually calibrated,  
207 pain intensity, thermode temperature, and time for each stimulus was sampled only during the  
208 timepoints at which thermode temperature was greater than T1-0.2°C. This epoch was further divided  
209 into t1 (5 seconds), t2 (5 seconds), and t3 (20 seconds) periods.

210 To identify extrema of pain intensity curves, the timepoint of transition from the t2 to t3 period was  
211 identified for each curve within each subject. Initially, the maximum or minimum during the 10-second  
212 epoch centered on the t2-to-t3 transition was calculated. Then, the subsequent minimum or maximum  
213 was determined in the time period following the initially calculated extremum. For example, in the  
214 analysis of the Inv pain intensity curve, the minimum during the 10-second epoch centered on the t2-to-  
215 t3 transition was obtained. The maximum following this minimum was subsequently obtained and  
216 recorded as the “local maximum” (e.g. Fig 4A). Similarly, in the analysis of the 2step pain intensity curve,  
217 the maximum during the 10-second epoch centered on the t2-to-t3 transition was first obtained,  
218 followed by measurement of the minimum value following this maximum (e.g. Fig 4E “local minimum”).  
219 This method was used to extract local pain intensity extrema during all stimuli, including during the  
220 subtracted pain intensity curves (Fig 5 and 6).

221 For group-level analysis of pain intensity curves over time, pain intensity, thermode temperature and  
222 time were aligned so that the initial timepoint for all subjects occurred at the first timepoint where  
223 thermode temperature was greater than  $T1-0.2^{\circ}\text{C}$ . The data from each subject was then downsampled  
224 to 1 Hz. Group mean and 95% confidence intervals were then calculated for each timepoint. To compare  
225 the pain intensity curves across stimuli, repeated measures 2-way ANOVAs were performed during the  
226 relevant time period with matching by stimulus and time with post-hoc testing using Sidak’s multiple  
227 comparisons test.

228 For group-level analysis of extrema, extrema were obtained from complex curves within each subject as  
229 outlined above and then the group-level mean and 95% confidence intervals were calculated. To  
230 compare with control curves, the timepoint of the extreme value was used to identify pain intensity at  
231 the same timepoint within each subject in the control curve (Fig 1 B-D, arrow “a”).

232 Within-stimulus change was analyzed by obtaining extrema and subtracting them within each subject.  
233 For example, for Inv, the local minimum was subtracted from the local maximum (Fig 1B, “b” arrow).  
234 The value of the subtraction was then averaged across the group to obtain the group-level mean. The  
235 change in pain intensity during the same timepoints as the complex pain intensity extrema was also  
236 extracted from the appropriate control pain intensity curves. For example, when comparing with the Inv  
237 stimulus pain intensity, pain intensity values from the T2 stimulus were obtained at the Inv pain  
238 intensity maximum and minimum. In this particular case, the direction of change is negative since the  
239 timepoint of the Inv maximum has a smaller pain intensity in the T2 stimulus than the timepoint of the  
240 Inv minimum, which is reflected in Fig 4B.

241 A similar approach was applied to extract extrema and determine within-curve changes for the  
242 difference curves. Again, these values were calculated within each subject, and then averaged for a  
243 group mean value.

244 For comparisons between stimuli extrema and within-stimulus/within-curve change, paired t-tests were  
245 performed. Given randomization of noxious stimulus order, these values were treated as independent  
246 observations, and therefore did not require additional nested analyses. Univariate correlations were  
247 assessed by calculating Pearson’s r coefficient and accompanying p-values. 95% CI of Pearson’s r were  
248 calculated with Fisher’s transformation. Univariate linear regressions were calculated to draw regression  
249 lines in Fig 9.

250 Subject data were collected and managed using REDCap hosted at UCSF [28]. Anonymized data from  
251 REDCap were exported as a flat file and combined with anonymized sensory testing data and survey  
252 data using Excel (Microsoft, Redmond, Washington). Graphical and statistical analysis was performed  
253 using Matlab R2016b (The MathWorks, Natick, Massachusetts), StataMP v14 (Statacorp, College Station,  
254 Texas) and Prism 7 (GraphPad Software, La Jolla, California).

## 255 **Results**

### 256 **The onset of supra-threshold noxious heat disproportionately** 257 **increases subjective pain intensity when preceded by a transient** 258 **decrease in noxious heat.**

259 Healthy subjects (N=74; 35 female and 39 male, mean age of 28.2 years  $\pm$  SD 7.2 years with range 18-50  
260 years) underwent heat pain testing using a 30 mm by 30 mm thermode applied to the volar surface of  
261 the non-dominant forearm (Fig 1). The group mean heat pain threshold was 44.6  $^{\circ}\text{C}$   $\pm$  SD 1.7  $^{\circ}\text{C}$ .

262 Ascending noxious-range 30-second heat steps were then used to calibrate the specific temperatures  
263 used in suprathreshold heat stimuli for each subject. The temperature that elicited a pain intensity  
264 rating of 50 mm at the end of a 30-second stimulus was defined as the T1 for an individual subject. The  
265 mean T1 used was 45.8 $^{\circ}\text{C}$   $\pm$  SD 1.7 $^{\circ}\text{C}$  ranging from 39 $^{\circ}\text{C}$  to 47 $^{\circ}\text{C}$ . T2 was defined as 1  $^{\circ}\text{C}$  hotter than T1.  
266 Using individualized T1 and T2 values, subjects underwent a battery of randomly-ordered  
267 suprathreshold heat stimuli, including both complex (Inv, 3step, and 2step) and control (T1 and T2)  
268 stimuli as outlined in Fig 1.

269 We tested the hypothesis that a rising cutaneous noxious heat stimulus produces a disproportionately  
270 greater reported pain intensity than when the same intensity stimulus is constant. Pain intensity ratings  
271 obtained during a novel complex suprathreshold heat stimulus, Inv, and a constant control stimulus, T2,  
272 were compared (Fig 2). During the t3 period in which thermode temperature is the same in both the Inv  
273 and control T2 stimuli (shaded area in Fig 2), reported pain intensity appeared greater in the Inv  
274 stimulus than the reported pain intensity in the control T2 stimulus. To understand the effect of stimulus  
275 type (Inv vs. T2) on reported pain intensity over time, a 2-way repeated-measures ANOVA during the t3

276 period with matching by stimulus and time was calculated and demonstrated a significant main effect of  
277 stimulus type ( $F(1.000, 73.00) = 6.041, p=0.0164$ ), time ( $F(2.389, 174.4) = 23.27, p<0.0001$ ), and time x  
278 stimulus type interaction ( $F(3.870, 282.5) = 46.54, p<0.0001$ ). Sidak's multiple comparison test  
279 confirmed statistically significant differences between Inv and control T2 stimuli at each timepoint noted  
280 in Fig 2 with asterisks reflecting corrected p-value thresholds. During the t3 period, despite identical  
281 thermode temperatures, reported pain intensity following a noxious stimulus increase in the Inv  
282 stimulus was significantly higher than the reported pain intensity during the constant T2 stimulus.

283 **Fig 2: Pain intensity disproportionately increases following a transient, small decrease in**  
284 **temperature. A.** Group mean temperature (top) and continuous pain intensity rating (bottom)  
285 curves from the Inv (black circles) and T2 control (orange triangles) stimuli are shown. Symbols  
286 represent group-level mean and error bars represent 95% confidence intervals. P-values: \*  
287  $p<0.05$ , \*\*  $p<0.01$ , \*\*\*  $p<0.001$ , \*\*\*\*  $p<0.0001$ .

288 **The offset of supra-threshold noxious heat disproportionately**  
289 **decreases pain intensity report and does not require a preceding**  
290 **transient increase in noxious heat.**

291 To confirm the finding that small reductions in cutaneous noxious heat lead to disproportionate  
292 decreases in pain perception [8], pain intensity ratings during the complex suprathreshold heat stimulus  
293 frequently used to elicit offset analgesia (3step) were compared with pain intensity ratings during the  
294 control, constant T1 stimulus (S1 Fig). Using pain intensity data from the t3 period of 3step and T1  
295 stimuli, a 2-way repeated-measures ANOVA with matching by stimulus and time demonstrated a  
296 significant main effect of stimulus type ( $F(1.000, 73.00) = 5.389, p=0.0231$ ), time ( $F(1.899, 138.6) =$   
297  $90.93, p<0.0001$ ), and time x stimulus type interaction ( $F(2.718, 198.4) = 88.62, p<0.0001$ ). Sidak's

298 multiple comparison test confirmed statistically significant differences noted in Supplemental Fig 1 with  
299 asterisks representing corrected p-value thresholds for between stimulus comparisons at each  
300 timepoint.

301 **S1 Fig: A transient increase then decrease in noxious heat decreases subsequent**  
302 **intensity.** Group mean temperature (top) and continuous pain intensity rating (bottom) curves  
303 from the 3step (green circles) and T1 control (orange triangles) stimuli are shown. Symbols  
304 represent group-level mean and error bars represent 95% confidence intervals. P-values: \*  
305  $p < 0.05$ , \*\*  $p < 0.01$ , \*\*\*  $p < 0.001$ , \*\*\*\*  $p < 0.0001$ .

306 To test whether the preceding transient increase to T2 is required for decreased pain intensity in the t3  
307 period following a temperature offset, a two-step design was used (2step stimulus). Pain intensities  
308 during the 2step heat stimulus were compared with those during the constant control T1 stimulus (Fig  
309 3). During the t3 period in which thermode temperature is the same, pain intensity during the 2step  
310 stimulus appears lower than the pain intensity during the T1 stimulus. This is a statistically significant  
311 difference, since a 2-way repeated-measures ANOVA with matching by stimulus and time showed a  
312 significant main effect of stimulus type ( $F(1.000, 73.00) = 15.16, p = 0.0002$ ), time ( $F(2.122, 154.9) =$   
313  $62.01, p < 0.0001$ ), and time x stimulus type interaction ( $F(3.171, 231.5) = 55.36, p < 0.0001$ ) with  
314 significant *post hoc* testing using the Sidak multiple comparison test (corrected p-values denoted in Fig  
315 3). Comparing pain intensity reported during the t3 period of either 3step or 2step with pain intensity  
316 during the same time period of the constant control stimulus T1 demonstrates that noxious range  
317 temperature decreases significantly decrease pain intensity.

318 **Fig 3: An isolated temperature decrease, without a preceding increase, reduces subsequent**  
319 **pain intensity.** Group mean temperature (top) and continuous pain intensity rating (bottom)  
320 curves from the 2step (blue circles) and T1 control (orange triangles) stimuli are shown. Symbols

321 represent group-level mean and error bars represent 95% confidence intervals. P-values: \*  
322  $p < 0.05$ , \*\*  $p < 0.01$ , \*\*\*  $p < 0.001$ , \*\*\*\*  $p < 0.0001$ .

323 **Within-subject analysis of pain intensity extrema confirms**  
324 **disproportionate changes in reported pain intensity with both noxious**  
325 **heat increases and decreases.**

326 To further characterize pain intensity differences between complex and control stimuli, local extrema  
327 were extracted from pain intensity curves during complex stimuli (Inv, 3step, and 2step) as discussed in  
328 the Methods section and Fig 1. For each planned comparison, the pain intensity at the same timepoint  
329 was extracted from the corresponding constant control curve (T1 or T2). Extrema and constant control  
330 pain intensity values were then averaged across the group to allow for group-level comparisons (Fig 1,  
331 arrow “a”). Additionally, within-stimulus pain intensity changes were calculated by subtracting the  
332 preceding minimum (for Inv) or maximum (for 3step and 2step) from the local extreme value in the t3  
333 period (maximum for Inv and minimum for 3step and 2step; see Fig 1, arrow “b”). Both analyses have  
334 previously been used in studies of offset analgesia (e.g. [7, 9, 12, 25, 29, 30]).

335 Both analytic methods confirm that complex stimuli, with preceding changes in supra-threshold noxious  
336 heat, elicit significantly different pain intensities than constant control stimuli. The local maximum of the  
337 reported pain intensity curve during the Inv stimulus is significantly greater than pain intensity during  
338 the T2 stimulus at the equivalent timepoint (Fig 4A). Additionally, the within-stimulus pain intensity  
339 change (Fig 1B, arrow “b”) is significantly greater during the Inv stimulus than the change measured at  
340 equivalent timepoints during the constant T2 stimulus (Fig 4B). Notably, the direction of change is  
341 different between the Inv and T2 stimuli. The T2 stimulus has a negative change, reflecting a decrease in  
342 pain intensity. The pain intensity difference at the local maximum of the Inv stimulus (Fig 4A) is 13.2 mm

343 (95% CI 9.3 mm – 17 mm), which appears to be greater in absolute magnitude than an estimate of offset  
344 analgesia magnitude calculated in a recent quantitative meta-analysis of -4.6 mm (95% CI -7.5 mm – -  
345 1.7 mm)[27].

346 **Fig 4: Extrema in continuously-rated pain intensity during complex stimuli are significantly**  
347 **different than controls.** Pain intensity values on the computerized visual analogue scale were  
348 extracted at local maxima (A.&B.) and minima (C.-F.) for each subject as described in Fig 1. Pain  
349 intensities at matching timepoints were also extracted during constant control stimuli (T1 or T2).  
350 In the left column, pain intensities are compared between complex and control stimuli (arrow  
351 “a” in Fig 1). In the right column, the change in pain intensity within the complex curve is  
352 compared with the change in the control curve during the same time interval (arrow “b” in Fig  
353 1). Group means with 95% CI are depicted in the bar graphs. Paired t-tests showed significant  
354 differences: \*\*\*\* p<0.0001.

355 For noxious heat decreases, the pain intensity minima during both 3step and 2step stimuli (Fig 4C and 4E  
356 respectively) were significantly lower than equivalent timepoints (uniquely determined for 3step and  
357 2step) during the control T1 stimulus. Similarly, the change in pain intensity within each stimulus was  
358 more negative, reflecting decreasing pain intensity, than that observed in the control T1 stimulus (Fig 4D  
359 and 4F).

360 **Comparison of Inv and 3step stimuli shows a similar absolute**  
361 **magnitude of changes in pain intensity despite opposite direction of**  
362 **change.**



363 To account for time-dependent changes in pain intensity, such as adaptation, and allow for comparison  
364 across complex stimuli, pain intensity curves during constant control stimuli, T2 and T1, were subtracted  
365 from pain intensity curves during complex stimuli, Inv and 3step respectively. This was done within each  
366 subject and then averaged at each timepoint across the group. The Inv-T2 pain difference curve with  
367 95% confidence intervals is plotted in Fig 5A, and the 3step-T1 pain difference curve is plotted in Fig 5B.  
368 To compare their relative absolute magnitude, the 3step-T1 pain difference was inverted and plotted on  
369 the same axis as the Inv-T2 pain difference curve (Fig 5C). Graphically, there appears to be substantial  
370 overlap between these two curves. During the t3 period, a repeated measures 2-way ANOVA with  
371 matching by both factors (subtraction curve and time) only showed a main effect of time ( $F(2.985, 217.9) = 83.84, p < 0.0001$ ) but no effect of subtraction curve type ( $F(1.000, 73.00) = 0.8225, p = 0.367$ ) or  
372 time by curve type interaction ( $F(3.785, 276.3) = 2.440, p = 0.051$ ). Post-hoc testing showed no significant  
373 differences between the Inv-T2 and T1-3step subtraction curves at individual timepoints (Sidak's MCT).  
374 Overall, these results suggest that increases and decreases in temperature at the t2-to-t3 transition  
375 produce changes in pain intensity of opposite sign but highly similar absolute magnitude.  
376

377 **Fig 5: The magnitude of relative hyperalgesia and hypoalgesia with equivalent temperature**  
378 **increases and decreases is similar. A.** Pain intensity curves during Inv and T2 stimuli were  
379 subtracted for each subject with group mean values plotted; error bars = 95% CI. **B.** Similarly,  
380 pain intensity curves during 3step and T1 stimuli were subtracted with group mean values  
381 plotted; error bars = 95% CI. In A. and B., shaded regions reflect the time period in which  
382 thermode temperatures are the same between complex (Inv or 3step) and constant (T2 or T1)  
383 stimuli. **C.** To compare pain difference curves, the inverse of the 3step-T1 subtraction curve in B.  
384 was plotted with the Inv-T2 subtraction curve. Means and 95% CI are shown at each timepoint.  
385

386 Pain intensity reported during the complex stimuli was further compared between Inv and 3step stimuli  
387 using extrema and within-stimulus change analysis described above and in Fig 1. In Fig 6A, the absolute  
388 magnitude of the difference between complex stimulus extrema (minimum for 3step and maximum for  
389 Inv) and the equivalent timepoint in the control stimulus (T1 for 3step and T2 for Inv; Fig 1, “a” arrows)  
390 was averaged across the group and plotted with 95% confidence intervals. A paired t-test shows no  
391 significant difference between these two values. In Fig 6B, the group mean average of within-stimulus  
392 change (Fig 1, “b” arrows), maximum – minimum for 3step with equivalent timepoints during T1 and  
393 maximum – minimum for Inv and equivalent timepoints during T2, are plotted. To compare within-  
394 stimulus pain intensity change across stimulus type, a repeated measures 1-way ANOVA with matching  
395 by subject was calculated and showed a significant main effect of stimulus type ( $F(1, 901, 138.8) = 149.7$ ,  
396  $p < 0.0001$ ). Planned post-hoc testing with Sidak’s MCT showed significant differences not only between  
397 3step and Inv, but also between the constant control stimuli (T1 versus T2). Interestingly, the mean  
398 differences between Inv and T2 (44.5 mm; 95% CI 36.9 mm-52.1 mm) and 3step and T1 (39.2 mm; 95%  
399 CI 32.0 mm-46.4 mm) appeared similar, as did the mean differences between Inv and 3step (9.2 mm;  
400 95% CI 3.7 mm-14.6 mm) and T2 and T1 (14.5 mm; 95% CI 8.1 mm-21.0 mm). This suggests that the  
401 observed difference between Inv and 3step in Fig 6B may actually be due to time-dependent changes  
402 shared across all stimuli (e.g. adaptation). To account for this possibility, the difference curves (Inv-T2  
403 and T1-3step, plotted in Fig 5C) were analyzed. Within each subject, the maxima of the difference curves  
404 following the minima occurring around the t2-to-t3 transition was determined and then averaged across  
405 the group. Fig 6C (left) shows that the maxima of the Inv-T2 curve during the t3 period was in fact  
406 slightly larger than the maxima of the T1-3step (paired t-test; mean difference 6.1 mm; 95% CI 2.1 mm –  
407 10.1 mm). However, the within-curve change of the subtraction curves did not reach a statistically  
408 significant difference. Taken together, it appears that the increase in pain intensity following the noxious

409 heat increase during the Inv stimulus is similar in magnitude to the decrease in pain intensity following  
410 the noxious heat decrease during the 3step stimulus.

411 **Fig 6: Within-subject analysis controlling for adaptation shows no significant difference in the**  
412 **magnitude of pain deviations in complex stimuli despite their opposite direction of change. A.**  
413 The difference between pain intensity extrema (max for Inv, min for 3step) and the pain  
414 intensity during control stimuli (T2 for Inv, T1 for 3step), reflecting “a” arrows in Fig 1, was  
415 determined within each subject. **B.** Change in pain within stimulus (max – min, “b” arrows in Fig  
416 1), for complex stimuli and matched timepoints during control stimuli. 1-way RM ANOVA  
417 showed significant main effect of stimulus. Post-hoc testing showed significant differences  
418 including those shown. **C.** Subtraction curves were analyzed within each subject for extrema and  
419 within-curve change. For all graphs, group mean with 95% CI error bars are plotted. P-values: \*\*  
420  $p < 0.01$ , \*\*\*  $p < 0.001$ , \*\*\*\*  $p < 0.0001$ .

421 **A simple noxious stimulus increase, if not preceded by a decrement,**  
422 **produces a much smaller increase in pain intensity.**

423 The effect of the temperature increase at the t1-to-t2 transition on subsequent pain intensity during the  
424 t2 period was also explored. During the t2 period, the thermode temperatures are the same between  
425 3step, T2 and the 2step stimuli. Therefore, comparisons between 3step and either T2 or 2step stimuli  
426 should inform the effect of a simple temperature increase. Group averaged time series data of pain  
427 intensity are plotted in Fig 7A and 7C. Group averaged local maxima during the 3step stimulus are  
428 compared with pain intensity values during control stimuli, T2 (Fig 7B) and 2step (Fig 7D). There were  
429 small differences between the 3step and controls that reached statistical significance with paired t-tests.  
430 Repeated measures 2-way ANOVAs during the t2 period were calculated. For 3step versus T2 (Fig 7A),

431 there were main effects of time ( $F(1.634, 119.3) = 103.9, p < 0.0001$ ), stimulus ( $F(1.000, 73.00) = 6.801,$   
432  $p = 0.0110$ ), and time x stimulus ( $F(1.790, 130.7) = 99.69, p < 0.0001$ ). For 3step versus 2step, there were  
433 main effects of time ( $F(1.422, 103.8) = 58.23, p < 0.0001$ ) and time x stimulus ( $F(1.594, 116.4) = 63.69,$   
434  $p < 0.0001$ ), but no main effect of stimulus ( $F(1.000, 73.00) = 1.364, p = 0.2466$ ). Post-hoc testing using  
435 Sidak's MCT showed significant differences labeled on the graphs with asterisks. Although apparent only  
436 with analysis of pain intensity curve maxima, there appeared to be a small increase in pain intensity  
437 during the t2 period of the 3step stimulus compared with control stimuli.

438 **Fig 7: An increase in temperature within the noxious range without an immediately preceding**  
439 **decrease produces a small increase in pain intensity. A.** Group mean continuous pain intensity  
440 rating curves from the 3step (green circles) and T2 control (red triangles) stimuli are plotted. **B.**  
441 Group mean pain intensity local maxima during the 3step stimulus and the pain intensity at the  
442 equivalent timepoint during the control T2 stimulus are plotted. **C.** Group mean continuous pain  
443 intensity rating curves from the 3step (green circles) and 2step (blue circles) stimuli are plotted.  
444 **D.** Group mean pain intensity local maxima during the 3step stimulus and the pain intensity at  
445 the equivalent timepoint during the control 2step stimulus are plotted. For all graphs (A.-D.),  
446 group means are plotted with error bars representing 95% CI. P-values: \*\*  $p < 0.01$ , \*\*\*\*  
447  $p < 0.0001$ . ND = no difference ( $p > 0.05$ ).

448 **A simple decrease in noxious heat elicits a subtly larger offset**  
449 **analgesia than a decrease preceded by an increase.**

450 Comparing pain intensity during 3step and 2step stimuli interrogates the perceptual effect of a prior  
451 temperature increase on a subsequent decrease in the t3 period. Group mean timeseries data are  
452 plotted in Fig 8A with comparisons of local minima, within-stimulus change, and pain difference analyses

453 shown in Fig 8B-D. Comparing pain intensity at the local minima and the difference between the local  
454 minima the constant control stimulus T1 (Fig 1C&D, “a” arrows) shows a slightly larger magnitude offset  
455 analgesia (more negative) in the 2step stimulus than the 3step stimulus that reaches statistical  
456 significance (Fig 8B, paired t-tests). Fig 8B also shows there is no difference when comparing within-  
457 stimulus changes in pain intensity between 2step and 3step stimuli (Fig 1C&D, “b” arrows). A repeated  
458 measures 2-way ANOVA comparing pain intensity curves during the t3 period of 2step and 3step stimuli  
459 (Fig 8) revealed a main effect of time ( $F(2.325, 169.7) = 102.8, p < 0.0001$ ) and stimulus type ( $F(1.000,$   
460  $73.00) = 8.518, p = 0.0047$ ) without an interaction ( $F(3.852, 281.2) = 0.4906, p = 0.7357$ ). Post-hoc testing  
461 with Sidak’s MCT showed no single timepoint difference achieved statistical significance. Taken  
462 together, it appears that offset analgesia is slightly larger in the 2step stimulus compared with the 3step  
463 stimulus.

464 **Fig 8: A noxious temperature decrease without a prior increase produces a subtly larger**  
465 **decrease in pain intensity. A.** Group mean temperature (top) and continuous pain intensity  
466 rating (bottom) curves from the 2step (blue circles) and 3step (green circles) stimuli are shown.  
467 Symbols represent group-level mean and error bars represent 95% confidence intervals.  
468 Although a 2-way RM ANOVA with matching by stimulus and time showed main effects of time  
469 and stimulus, there was no statistically significant difference at any timepoint during the t3  
470 interval. **B.** Group means obtained by within-subject analysis of minima (local min), the change  
471 in pain from maxima to minima (within-stimulus change) and the difference between complex  
472 curve minima and T1 at equivalent timepoints (difference with T1) are plotted with error bars  
473 representing 95% CI. P-values: \*\*\*  $p < 0.001$ .

474 **Although stimulus temperature is not correlated with**  
475 **disproportionate decreases or increases in pain during 3step and Inv**  
476 **stimuli, the magnitudes of the two are inversely correlated.**

477 In the initial characterization of offset analgesia in 12 volunteers, the magnitude of offset analgesia was  
478 consistent across a range of noxious temperatures [8]. In the current larger dataset, there again appears  
479 to be no correlation between initial temperature and offset analgesia (Fig. 9A&B, Table 1). No  
480 correlation exists between offset analgesia (measured as the local minimum during the 3-step stimulus  
481 minus the pain rating during the constant T1 stimulus, Fig 1C “a” arrow) and either heat pain threshold  
482 or T1 temperature (Fig. 9A&B;  $R^2 < 0.0001$  and  $R^2 = 0.0005$  respectively). This is consistent with other  
483 studies, in which offset analgesia was demonstrated following heat stimulus changes from a range of  
484 initial temperatures. Additionally, there is no correlation between pain intensity amplification during the  
485 Inv stimulus (measured as the local maximum during the Inv stimulus minus the pain rating at the same  
486 time point during the constant T2 stimulus, Fig 1B “a” arrow) and either heat pain threshold or T1  
487 temperature (Fig. 9C&D, Table 1;  $R^2 = 0.0006$  and  $R^2 = 0.007$  respectively). Using other measures of  
488 perceptual enhancement of temperature changes, including within-stimulus change (Fig 1B&C, “b”  
489 arrows), local extrema of subtraction curves (Fig 6C), and within-curve change of subtraction curves (Fig  
490 6C), again there was generally no correlation with stimulus temperature or other variables listed above  
491 (Table 1). We did find a weak correlation between Inv within-stimulus change (Table 1; Fig 1B, “b”  
492 arrows) and both T1 temperature used ( $R^2 = 0.0762$ ) and heat pain threshold ( $R^2 = 0.0538$ ), but this was  
493 not seen with other measures of perceptual enhancement. Taken together, it appears that there is  
494 minimal relationship between the magnitude of the perceptual amplification or inhibition of pain  
495 produced by small temperature changes and the initial noxious stimulus intensity prior to the change.

496 **Fig 9: Pain intensity amplification with either increases or decreases are independent of**  
497 **temperature but are correlated with each other.** Scatter plots are shown with each point  
498 representing an individual subject. Solid lines represent best-fit lines from linear regression  
499 analysis. Dotted lines represent bounds of the 95% confidence intervals calculated as part of the  
500 linear regression. No correlation exists between temperatures (heat pain threshold (A. or C.) or  
501 T1 stimulus temperature used (B. or D.)) and pain intensity amplification with noxious  
502 temperature decreases (3step Min-T1) and increases (Inv Max-T2). There is a trend toward an  
503 inverse correlation between perceptual enhancement of increases and decreases (E.) which  
504 becomes significant in the subgroup of subjects in grey (N=50,  $R^2=0.12$ ,  $p=0.014$ ).

505 **Table 1: Correlation coefficients between measures of perceptual enhancement of noxious**  
506 **stimulus increases, offset analgesia, and psychosocial attributes.**

507 As an initial comparison between perceptual enhancement of noxious stimulus increases and decreases,  
508 pairwise correlations were made using measures outlined above. Interestingly, there were moderate to  
509 strong inverse correlations observed using measures of within-stimulus change (Table 1;  $r = 0.73$ , 95% CI  
510  $0.61 - 0.82$ ; Fig 1B&C, “b” arrows) and the within-subtraction-curve change (Table 1;  $r = 0.80$ , 95% CI  
511  $0.70 - 0.87$ ; Fig 6C, right). A weak inverse correlation was observed using subtraction curve extrema  
512 (Table 1;  $r = 0.25$ , 95% CI  $0.017 - 0.448$ ). Using the difference between complex stimuli extrema and  
513 control stimuli (Fig 1B&C, “a” arrows), there was no significant correlation between pain intensity  
514 amplification following increases and decreases, although there appeared to be a trend towards  
515 significance (Table 1 and Fig 9E;  $r = -0.22$ , 95% CI  $-0.416 - 0.022$ ;  $R^2=0.041$ , deviation of slope from zero:  
516  $p=0.084$ ). In a subset of subjects who had both offset analgesia (negative values) and increased pain  
517 intensity with temperature increases in Inv versus T2 (positive values), a linear regression did reveal a  
518 significant correlation (Fig 9E; linear regression, N=50,  $R^2= 0.12$ , deviation of slope from zero:  $p=0.014$ ).

519 Additionally, neither offset analgesia nor the disproportionate increase in pain intensity during the Inv  
520 stimulus correlated well with age, sex, body mass index, socioeconomic status, self-report measures of  
521 pain catastrophizing, depression, anxiety, or impulsivity (univariate correlations; Table 1). There were a  
522 few weak correlations that did achieve statistical significance that are noted in Table 1. Overall, there  
523 does appear to be a significant correlation between offset analgesia and perceptual enhancement of  
524 noxious stimulus increases.

## 525 Discussion

526 The disproportionate drop in subjective pain sensation elicited by a decreasing noxious stimulus has  
527 been termed offset analgesia (OA) [7, 8]. Here, we demonstrate a disproportionate enhancement when  
528 the noxious stimulus is increasing (onset hyperalgesia, OH). Several lines of evidence support the  
529 existence of OH found in our study. First, using a novel heat stimulus in which a transient decrease in  
530 temperature from T2 to T1 is followed by a return to T2 (Inv stimulus), we observed significantly  
531 elevated pain intensity ratings at T2 compared with those reported in the constant control T2 stimulus.  
532 This was apparent using group-mean time series data (Fig 2) as well as within-subject analysis of local  
533 maxima and change in pain (Fig 4A&B). Additionally, comparing complex curves (Inv and 3step) showed  
534 similar perceptual enhancement with temperature increases (Inv) and decreases (3step). The InvT2  
535 subtraction was no different from the sign-inverted 3stepT1 subtraction (Fig 5). Two different analyses  
536 also showed high similarity between OA and OH time course and magnitude measured as both  
537 difference from complex curve extrema and within-stimulus changes (Fig 6). Consistent with the known  
538 influence of prior pain experience on current pain intensity, we observe that the magnitude of both OA  
539 and OH is affected by the prior trajectory of the noxious stimulus. Finally, the magnitude of OA has a  
540 moderate inverse correlation with that of OH. Overall, these results are consistent with a unifying model



541 of OA and OH in which the direction of change of noxious stimulus intensity strongly influences pain  
542 perception.

543 Prior studies support the notion of OH. Using radiant heat with an infrared laser, Morch and colleagues  
544 demonstrated that there is perceptual enhancement of temperature increases compared with a  
545 constant stimulus[15]. However, their model predicting pain intensity showed larger magnitude  
546 perceptual enhancement with temperature decreases than increases. The current study extends these  
547 findings by reporting the first evidence of OH using contact heat and demonstrates similar absolute  
548 magnitudes of OA and OH. Additionally, our findings provide empirical support for a non-linear model of  
549 pain intensity that incorporates perceptual feedback proposed by Apkarian and colleagues [14]. This  
550 model predicted a rapid increase in pain intensity observed with the increase from T1 to T2 during the t2  
551 period of a 3step stimulus. The authors noted the change to be more subtle than the OA effect, but did  
552 not further quantify it. We quantified this small increase in pain intensity by comparing the 3step  
553 stimulus (Fig 7) with the control T2 stimulus. Importantly, our observation of different magnitudes of OH  
554 and OA depending on the prior trajectory of the heat stimulus is consistent with a perceptual feedback  
555 model incorporating change in noxious stimulus intensity as a variable that predicts subjective pain  
556 intensity. Overall, the observation that the novel noxious heat stimulus, Inv, elicits onset hyperalgesia  
557 complements and extends prior work suggestive of the phenomenon.

558 We also found evidence of OA following a simple noxious heat decrease in the 2step stimulus that was  
559 equivalent if not subtly larger than OA measured during the 3step stimulus. In contrast, Haggard and  
560 colleagues recently reported no changes in pain intensity with isolated temperature decreases  
561 compared with constant stimuli[31]. This difference may be due to technical reasons including the use  
562 of individually tailored stimulus temperatures in the current study as opposed to predetermined  
563 temperatures and the possible confound of concurrent mechanical stimulation with Haggard and

564 colleagues' thermode setup. Haggard and colleagues suggest an alternative reason, in which a certain  
565 duration in the noxious range is required to elicit OA. Kurata and colleagues reported greater magnitude  
566 OA with a longer T2 duration following a constant, 5-second T1 duration in a three-step stimulus  
567 design[32]. Taken together with our observation of OA in the 2step stimulus, we suggest Haggard and  
568 colleagues would have found OA and OH with longer-duration noxious stimulation prior to the simple  
569 temperature changes.

570 Although identifying neural mechanisms of OH is beyond the scope of the current study, we did find  
571 similarity with OA, which is thought to involve central processing based on several behavioral and  
572 neuroimaging experiments[9, 10, 14, 26, 33, 34]. Like OA[8], the temperature of T1 used does not  
573 correlate well with the magnitude of OH (Fig 9 and Table 1). Heat pain threshold, which was measured  
574 prior to supra-threshold testing, also does not correlate well with either OA or OH. Interestingly, there  
575 may be a correlation between OA and OH, although the strength of correlation depends on how each is  
576 measured. Within-stimulus change in pain intensity (Fig 1 "b" arrows) and within-curve change of the  
577 subtraction curves show moderate correlations between OH and OA. Analysis of extrema (Fig 1B "a"  
578 arrows) show a weak correlation between OH and OA, which becomes moderate in the subgroup of  
579 subjects with both OA and OH (Fig 9E). Interestingly, within-stimulus change measures show only weak-  
580 moderate correlation with extrema difference measures (Fig 1B "b" versus "a" arrows; Table 1),  
581 consistent with divergent measurement effects observed in a recent meta-analysis of OA[27]. Given the  
582 stronger correlation between OA and OH using the within-stimulus change, it seems possible that  
583 studies only analyzing that measure may be capturing a composite outcome reflecting both OA and  
584 OH[8, 9, 13, 25, 33, 35-37]. Certainly, additional studies are required to clarify the mechanisms of OH  
585 and its relationship to OA in different populations.

586 Given our findings of OH and subtle differences in magnitude of both OH and OA depending on  
587 immediately prior noxious stimulus intensity, we favor an explanatory model similar to that proposed by  
588 Apkarian and colleagues[14] and outlined in [38] whereby changing noxious stimulus intensity impacts  
589 predictions of pain and pain relief which modulates nociceptive transmission and pain perception  
590 bidirectionally. We observed that the magnitude of OH was larger during the Inv stimulus than during  
591 the 3step stimulus. This could be due to differences in how predicted pain intensity changes, which will  
592 differ between these two stimuli. According to our proposed model, the transient drop during the t2  
593 period in the Inv stimulus indicates that future stimulus intensity will likely decrease, reducing the  
594 motivation to engage in an action to terminate the noxious input. The rise back after the earlier  
595 decrease reverses the direction of the prediction and increasing the motivation to respond to the  
596 noxious stimulus. According to the Motivation-Decision model [39], this switch in action selection will  
597 engage a top down modulatory circuit that amplifies pain if the decision is to respond to it and inhibits  
598 pain if the decision is to ignore the pain. In different behavioral paradigms, changed  
599 predictions/expectations about pain intensity can elicit either increases or decreases in reported pain [6,  
600 40, 41].

601 On the other hand, the magnitude of OA was only subtly greater during the 2step stimulus as compared  
602 to the 3step stimulus. This could still be due to within-stimulus predictions, since the 2step stimulus did  
603 not have an initial period at T1, but only included a temperature decrease from T2 to T1. It is possible  
604 that the difference in perceptual enhancement between the stimuli is smaller than that observed  
605 between the Inv and 3step stimuli because the trajectory of pain intensity was generally the same – a  
606 noxious stimulus increase followed by a decrease. This combined model of OA and OH magnitude is  
607 supported by prior theoretical work[14] and by the observation that longer durations of the t2 interval  
608 in the three-step paradigm produce larger magnitude offset analgesia[32], since predictions can be  
609 time-dependent and continued pain predicts subsequent pain.

610 Alternative explanations for our observation of OH remain possible. Although our study design controls  
611 for time-dependent within-stimulus changes in pain intensity, such as adaptation or habituation, by  
612 incorporating constant control stimuli (T1 and T2), it is possible that there are independent competing  
613 time-dependent processes producing the pain intensity curves. For example, the increase in pain  
614 intensity in the t3 period of the Inv stimulus may result from temporal summation which is distinct from  
615 pain inhibiting processes, such as adaptation or OA. We do not favor this explanation since heat pain  
616 temporal summation occurs with more frequent temperature changes of at least 0.33 Hz and not at 0.25  
617 Hz or less[42], which is in the range of the Inv stimulus. Alternatively, the temperature decrement in the  
618 Inv stimulus during the t2 interval may reverse a single pain inhibiting process, reflecting a  
619 dishabituation. The current study cannot rule this possibility out, but given the known bidirectional  
620 effects of expectancy/predictions on pain intensity and previous reports supportive of OH without the  
621 temperature decrement[14, 15], we favor the motivation-decision model. Future studies designed to  
622 manipulate pain and pain relief predictions will help delineate mechanisms on the behavioral level.

623 In conclusion: The current study establishes the existence of OH and posits a model of OA and OH  
624 emphasizing how the predictive nature of changes in pain intensity strongly influencing individual  
625 responses to such changes through top down bidirectional modulation of nociceptive transmission.

## 626 **Acknowledgements:**

627 The authors acknowledge Nidhi Anamkath for administrative and technical support.

628

## 629 References

- 630 1. Price DD. Psychological and neural mechanisms of pain. New York: Raven Press; 1988. x, 241 p. p.  
631 2. Wager TD, Atlas LY. The neuroscience of placebo effects: connecting context, learning and health.  
632 Nature Reviews Neuroscience. 2015;16:403-18. doi: 10.1038/nrn3976.  
633 3. Keltner JR, Furst A, Fan C, Redfern R, Inglis B, Fields HL. Isolating the modulatory effect of  
634 expectation on pain transmission: a functional magnetic resonance imaging study. J Neurosci.  
635 2006;26(16):4437-43. doi: 10.1523/JNEUROSCI.4463-05.2006. PubMed PMID: 16624963.  
636 4. Geuter S, Koban L, Wager TD. The Cognitive Neuroscience of Placebo Effects: Concepts, Predictions,  
637 and Physiology. Annu Rev Neurosci. 2017;40:167-88. Epub 2017/04/13. doi: 10.1146/annurev-  
638 neuro-072116-031132. PubMed PMID: 28399689.  
639 5. Hoffman GA, Harrington A, Fields HL. Pain and the placebo: what we have learned. Perspect Biol  
640 Med. 2005;48:248-65. PubMed PMID: 15834197.  
641 6. Buchel C, Geuter S, Sprenger C, Eippert F. Placebo analgesia: a predictive coding perspective.  
642 Neuron. 2014;81(6):1223-39. doi: 10.1016/j.neuron.2014.02.042. PubMed PMID: 24656247.  
643 7. Yelle MD, Rogers JM, Coghill RC. Offset analgesia: A temporal contrast mechanism for nociceptive  
644 information. Pain. 2008;134:174-86. doi: 10.1016/j.pain.2007.04.014. PubMed PMID: 17533118.  
645 8. Grill JD, Coghill RC. Transient analgesia evoked by noxious stimulus offset. Journal of  
646 neurophysiology. 2002;87:2205-8. doi: 10.1152/jn.00730.2001. PubMed PMID: 11929939.  
647 9. Ligato D, Petersen KK, Morch CD, Arendt-Nielsen L. Offset analgesia: The role of peripheral and  
648 central mechanisms. Eur J Pain. 2018;22(1):142-9. Epub 2017/09/13. doi: 10.1002/ejp.1110.  
649 PubMed PMID: 28898500.  
650 10. Derbyshire SWG, Osborn J. Offset analgesia is mediated by activation in the region of the  
651 periaqueductal grey and rostral ventromedial medulla. NeuroImage. 2009;47:1002-6. doi:  
652 10.1016/j.neuroimage.2009.04.032. PubMed PMID: 19375510.  
653 11. Martucci KT, Eisenach JC, Tong C, Coghill RC. Opioid-independent mechanisms supporting offset  
654 analgesia and temporal sharpening of nociceptive information. Pain. 2012;153:1232-43. doi:  
655 10.1016/j.pain.2012.02.035. PubMed PMID: 22503222.  
656 12. Martucci KT, Yelle MD, Coghill RC. Differential effects of experimental central sensitization on the  
657 time-course and magnitude of offset analgesia. Pain. 2012;153:463-72. doi:  
658 10.1016/j.pain.2011.11.010. PubMed PMID: 22154333.  
659 13. Nahman-Averbuch H, Martucci KT, Granovsky Y, Weissman-Fogel I, Yarnitsky D, Coghill RC. Distinct  
660 brain mechanisms support spatial vs temporal filtering of nociceptive information. Pain.  
661 2014;155:2491-501. doi: 10.1016/j.pain.2014.07.008. PubMed PMID: 25047783.  
662 14. Petre B, Tetreault P, Mathur VA, Schurgin MW, Chiao JY, Huang L, et al. A central mechanism  
663 enhances pain perception of noxious thermal stimulus changes. Sci Rep. 2017;7(1):3894. Epub  
664 2017/06/22. doi: 10.1038/s41598-017-04009-9. PubMed PMID: 28634321; PubMed Central PMCID:  
665 PMC5478630.  
666 15. Morch CD, Frahm KS, Coghill RC, Arendt-Nielsen L, Andersen OK. Distinct temporal filtering  
667 mechanisms are engaged during dynamic increases and decreases of noxious stimulus intensity.  
668 Pain. 2015;156(10):1906-12. Epub 2015/06/03. doi: 10.1097/j.pain.0000000000000250. PubMed  
669 PMID: 26035254; PubMed Central PMCID: PMC4770340.  
670 16. Barratt W. The Barratt Simplified Measure of Social Status (BSMSS) measuring SES. 2006 [cited  
671 2017]. Available from: [http://socialclassoncampus.blogspot.com/2012/06/barratt-simplified-](http://socialclassoncampus.blogspot.com/2012/06/barratt-simplified-measure-of-social.html)  
672 [measure-of-social.html](http://socialclassoncampus.blogspot.com/2012/06/barratt-simplified-measure-of-social.html).

- 673 17. Wang YP, Gorenstein C. Psychometric properties of the Beck Depression Inventory-II: a  
674 comprehensive review. *Revista brasileira de psiquiatria (Sao Paulo, Brazil : 1999)*. 2013;35(4):416-31.  
675 Epub 2014/01/10. doi: 10.1590/1516-4446-2012-1048. PubMed PMID: 24402217.
- 676 18. Gaudry E, Vagg P, Spielberger CD. Validation of the State-Trait Distinction in Anxiety Research.  
677 *Multivariate behavioral research*. 1975;10(3):331-41. Epub 1975/07/01. doi:  
678 10.1207/s15327906mbr1003\_6. PubMed PMID: 26829634.
- 679 19. Starr CJ, Houle TT, Coghill RC. Psychological and sensory predictors of experimental thermal pain: a  
680 multifactorial model. *J Pain*. 2010;11(12):1394-402. Epub 2010/06/24. doi:  
681 10.1016/j.jpain.2010.03.014. PubMed PMID: 20570569; PubMed Central PMCID: PMC2954262.
- 682 20. Sullivan MJL, Bishop SR, Pivik J. The Pain Catastrophizing Scale: Development and validation.  
683 *Psychological Assessment*. 1995;7:524-32. doi: 10.1037/1040-3590.7.4.524. PubMed PMID:  
684 10719242.
- 685 21. Patton JH, Stanford MS, Barratt ES. Factor structure of the Barratt impulsiveness scale. *Journal of*  
686 *clinical psychology*. 1995;51(6):768-74. Epub 1995/11/01. PubMed PMID: 8778124.
- 687 22. Margari F, Lorusso M, Matera E, Pastore A, Zagaria G, Bruno F, et al. Aggression, impulsivity, and  
688 suicide risk in benign chronic pain patients - a cross-sectional study. *Neuropsychiatric disease and*  
689 *treatment*. 2014;10:1613-20. Epub 2014/09/13. doi: 10.2147/ndt.S66209. PubMed PMID:  
690 25214787; PubMed Central PMCID: PMC4159127.
- 691 23. Marino EN, Rosen KD, Gutierrez A, Eckmann M, Ramamurthy S, Potter JS. Impulsivity but not  
692 sensation seeking is associated with opioid analgesic misuse risk in patients with chronic pain. *Addict*  
693 *Behav*. 2013;38(5):2154-7. Epub 2013/03/05. doi: 10.1016/j.addbeh.2013.01.020. PubMed PMID:  
694 23454878; PubMed Central PMCID: PMC3595376.
- 695 24. Campbell CM, Kronfli T, Buenaver LF, Smith MT, Berna C, Haythornthwaite JA, et al. Situational  
696 Versus Dispositional Measurement of Catastrophizing: Associations With Pain Responses in Multiple  
697 Samples. *Journal of Pain*. 2010;11:443-53.e2. doi: 10.1016/j.jpain.2009.08.009. PubMed PMID:  
698 20439057.
- 699 25. Niesters M, Hoitsma E, Sarton E, Aarts L, Dahan A. Offset analgesia in neuropathic pain patients and  
700 effect of treatment with morphine and ketamine. *Anesthesiology*. 2011;115:1063-71. doi:  
701 10.1097/ALN.0b013e31822fd03a. PubMed PMID: 21878810.
- 702 26. Zhang S, Li T, Kobinata H, Ikeda E, Ota T, Kurata J. Attenuation of offset analgesia is associated with  
703 suppression of descending pain modulatory and reward systems in patients with chronic pain. *Mol*  
704 *Pain*. 2018;14:1744806918767512. Epub 2018/03/30. doi: 10.1177/1744806918767512. PubMed  
705 PMID: 29592786; PubMed Central PMCID: PMC5882045.
- 706 27. Szikszay TM, Adamczyk WM, Luedtke K. The Magnitude of Offset Analgesia as a Measure of  
707 Endogenous Pain Modulation in Healthy Participants and Patients With Chronic Pain: A Systematic  
708 Review and Meta-Analysis. *Clin J Pain*. 2019;35(2):189-204. Epub 2018/09/25. doi:  
709 10.1097/AJP.0000000000000657. PubMed PMID: 30247198.
- 710 28. Harris PA, Taylor R, Thielke R, Payne J, Gonzalez N, Conde JG. Research electronic data capture  
711 (REDCap)--a metadata-driven methodology and workflow process for providing translational  
712 research informatics support. *J Biomed Inform*. 2009;42(2):377-81. Epub 2008/10/22. doi:  
713 10.1016/j.jbi.2008.08.010. PubMed PMID: 18929686; PubMed Central PMCID: PMC2700030.
- 714 29. Derbyshire SW, Osborn J. Enhancement of offset analgesia during sequential testing. *Eur J Pain*.  
715 2008;12(8):980-9. Epub 2008/03/07. doi: 10.1016/j.ejpain.2008.01.008. PubMed PMID: 18321740.
- 716 30. Naugle KM, Cruz-Almeida Y, Fillingim RB, Riley JL, 3rd. Loss of Temporal Inhibition of Nociceptive  
717 Information Is Associated With Aging and Bodily Pain. *J Pain*. 2017;18(12):1496-504. Epub  
718 2017/08/30. doi: 10.1016/j.jpain.2017.08.003. PubMed PMID: 28847735; PubMed Central PMCID:  
719 PMC5712488.

- 720 31. Beck B, Gnanasampanthan S, Iannetti GD, Haggard P. No temporal contrast enhancement of simple  
721 decreases in noxious heat. *J Neurophysiol.* 2019;121(5):1778-86. Epub 2019/03/07. doi:  
722 10.1152/jn.00335.2018. PubMed PMID: 30840535; PubMed Central PMCID: PMC6589718.
- 723 32. Kobinata H, Ikeda E, Zhang S, Li T, Makita K, Kurata J. Disrupted offset analgesia distinguishes  
724 patients with chronic pain from healthy controls. *Pain.* 2017;158(10):1951-9. Epub 2017/07/27. doi:  
725 10.1097/j.pain.0000000000000989. PubMed PMID: 28746077.
- 726 33. Yelle MD, Oshiro Y, Kraft RA, Coghill RC. Temporal filtering of nociceptive information by dynamic  
727 activation of endogenous pain modulatory systems. *The Journal of neuroscience : the official journal*  
728 *of the Society for Neuroscience.* 2009;29:10264-71. doi: 10.1523/JNEUROSCI.4648-08.2009.  
729 PubMed PMID: 19692600.
- 730 34. Sprenger C, Stenmans P, Tinnermann A, Buchel C. Evidence for a spinal involvement in temporal  
731 pain contrast enhancement. *Neuroimage.* 2018;183:788-99. Epub 2018/09/07. doi:  
732 10.1016/j.neuroimage.2018.09.003. PubMed PMID: 30189340.
- 733 35. Oudejans LC, Smit JM, van Velzen M, Dahan A, Niesters M. The influence of offset analgesia on the  
734 onset and offset of pain in patients with fibromyalgia. *Pain.* 2015;156(12):2521-7. Epub 2015/08/14.  
735 doi: 10.1097/j.pain.0000000000000321. PubMed PMID: 26270589.
- 736 36. Honigman L, Yarnitsky D, Sprecher E, Weissman-Fogel I. Psychophysical testing of spatial and  
737 temporal dimensions of endogenous analgesia: conditioned pain modulation and offset analgesia.  
738 *Experimental brain research.* 2013;228:493-501. doi: 10.1007/s00221-013-3580-7. PubMed PMID:  
739 23712686.
- 740 37. Naugle KM, Cruz-Almeida Y, Fillingim RB, Riley JL. Offset analgesia is reduced in older adults. *Pain.*  
741 2013;154:2381-7. doi: 10.1016/j.pain.2013.07.015. PubMed PMID: 23872117.
- 742 38. Fields HL. How expectations influence pain. *Pain.* 2018;159 Suppl 1:S3-s10. Epub 2018/08/17. doi:  
743 10.1097/j.pain.0000000000001272. PubMed PMID: 30113941.
- 744 39. Fields HL. A Motivation-Decision Model of Pain: The Role of Opioids. In: Flor H, Kalso E, Dostrovsky J,  
745 editors. *Proceedings of the 11th World Congress on Pain: IASP Press; 2006.* p. 449-59.
- 746 40. Baliki MN, Apkarian AV. Nociception, Pain, Negative Moods, and Behavior Selection. *Neuron.*  
747 2015;87:474-91. doi: 10.1016/j.neuron.2015.06.005. PubMed PMID: 26247858.
- 748 41. Zhang S, Mano H, Ganesh G, Robbins T, Seymour B. Dissociable Learning Processes Underlie Human  
749 Pain Conditioning. *Curr Biol.* 2016;26(1):52-8. Epub 2015/12/30. doi: 10.1016/j.cub.2015.10.066.  
750 PubMed PMID: 26711494; PubMed Central PMCID: PMC4712170.
- 751 42. Staud R, Price DD, Fillingim RB. Advanced continuous-contact heat pulse design for efficient  
752 temporal summation of second pain (windup). *J Pain.* 2006;7(8):575-82. Epub 2006/08/04. doi:  
753 10.1016/j.jpain.2006.02.005. PubMed PMID: 16885014.

754



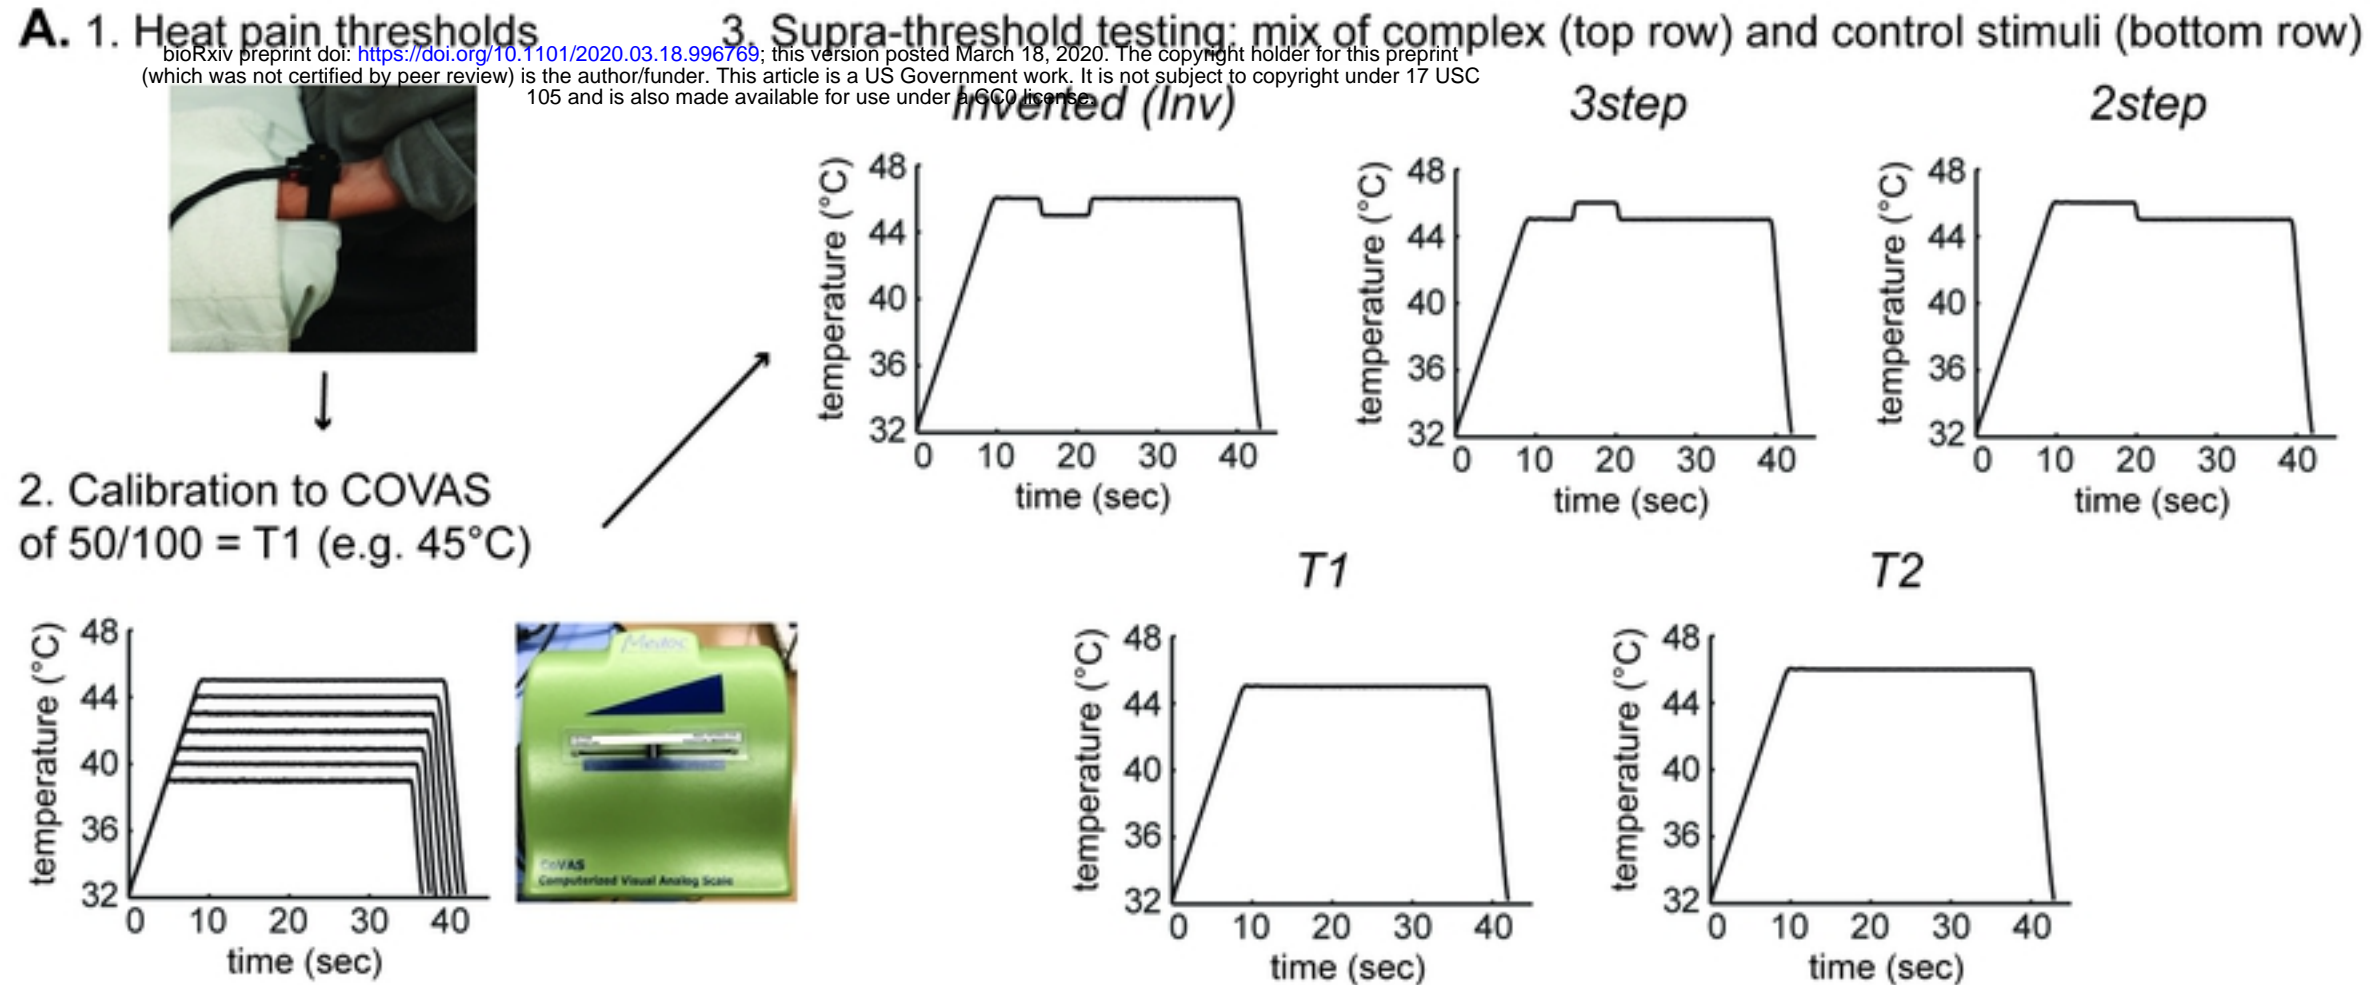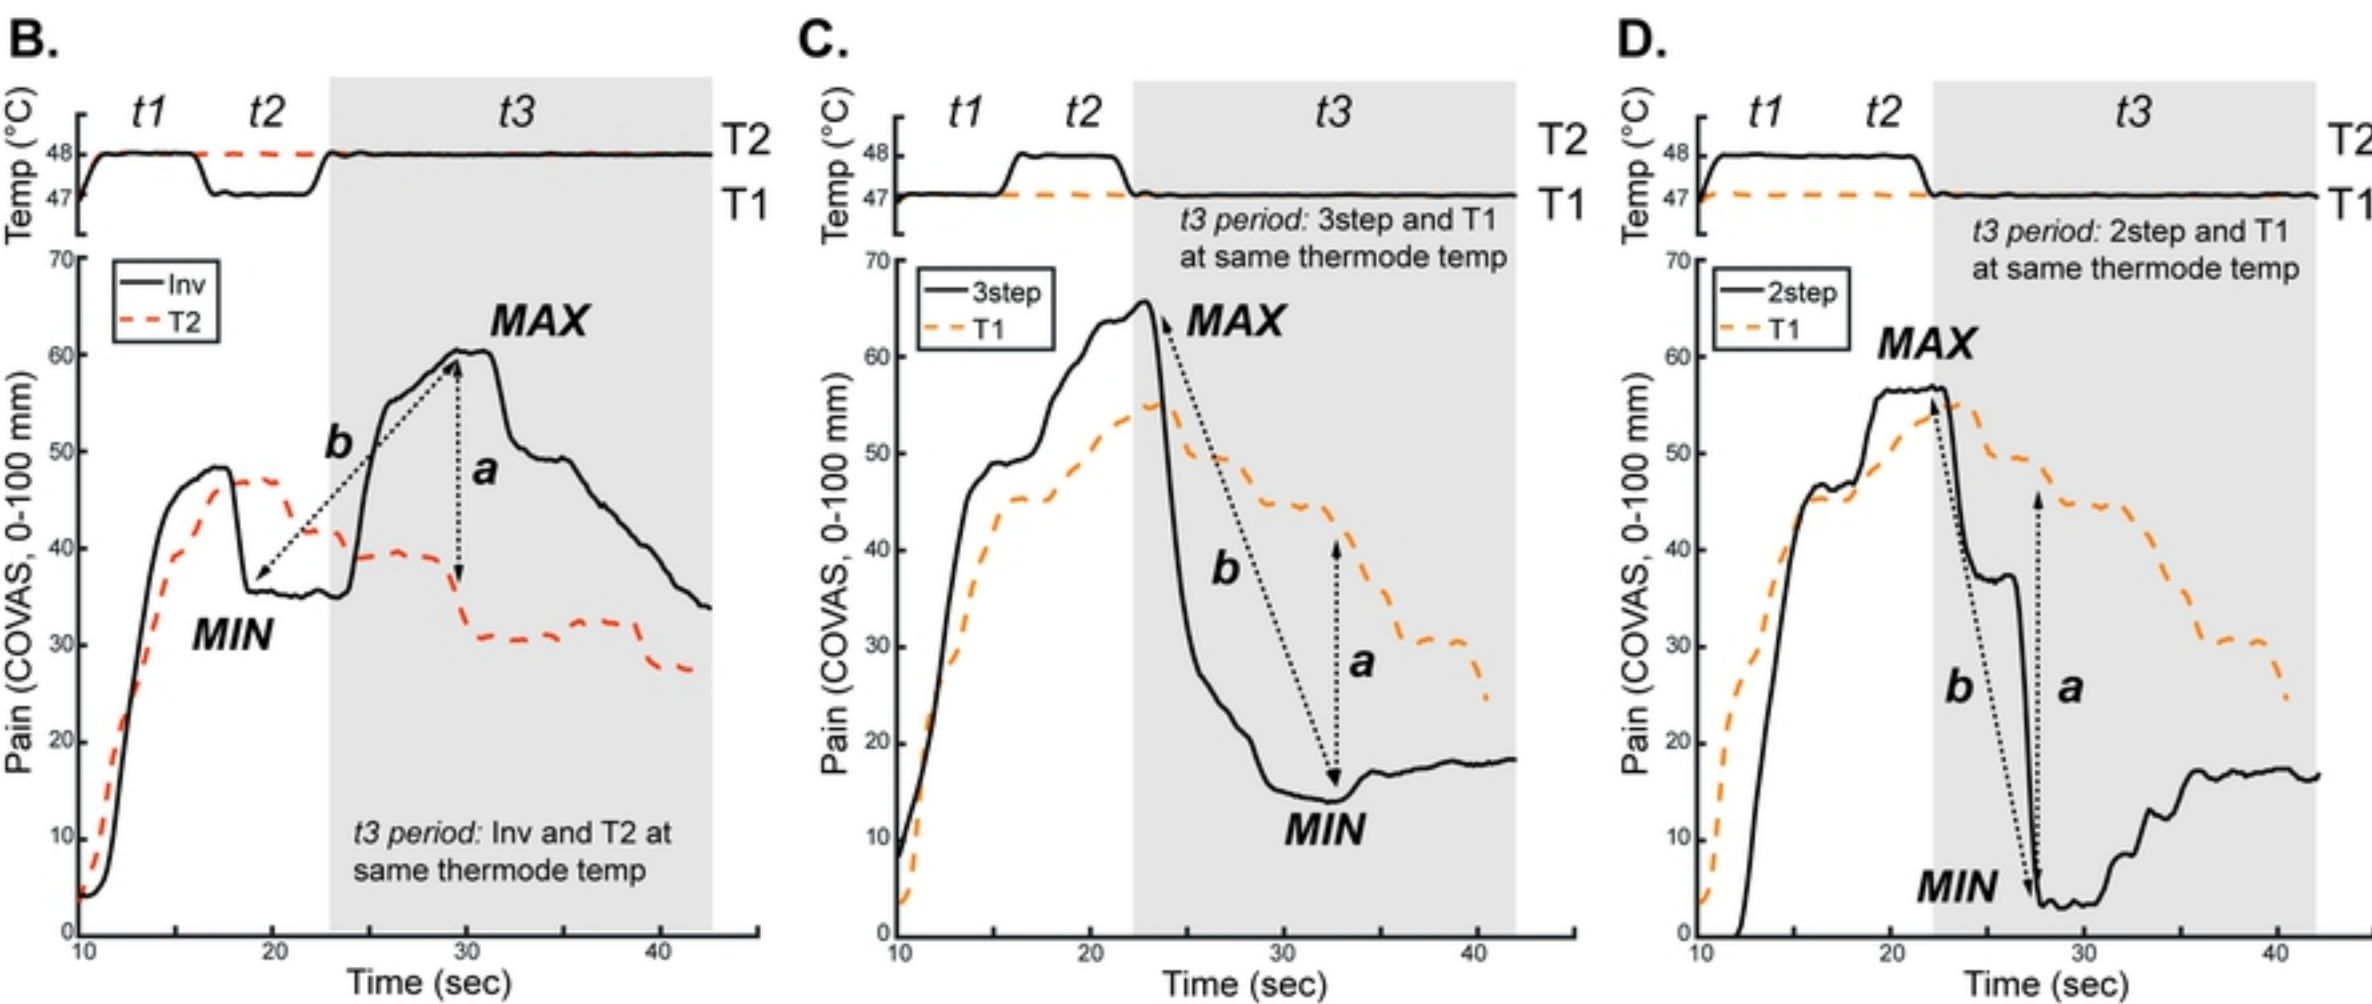

Figure 1



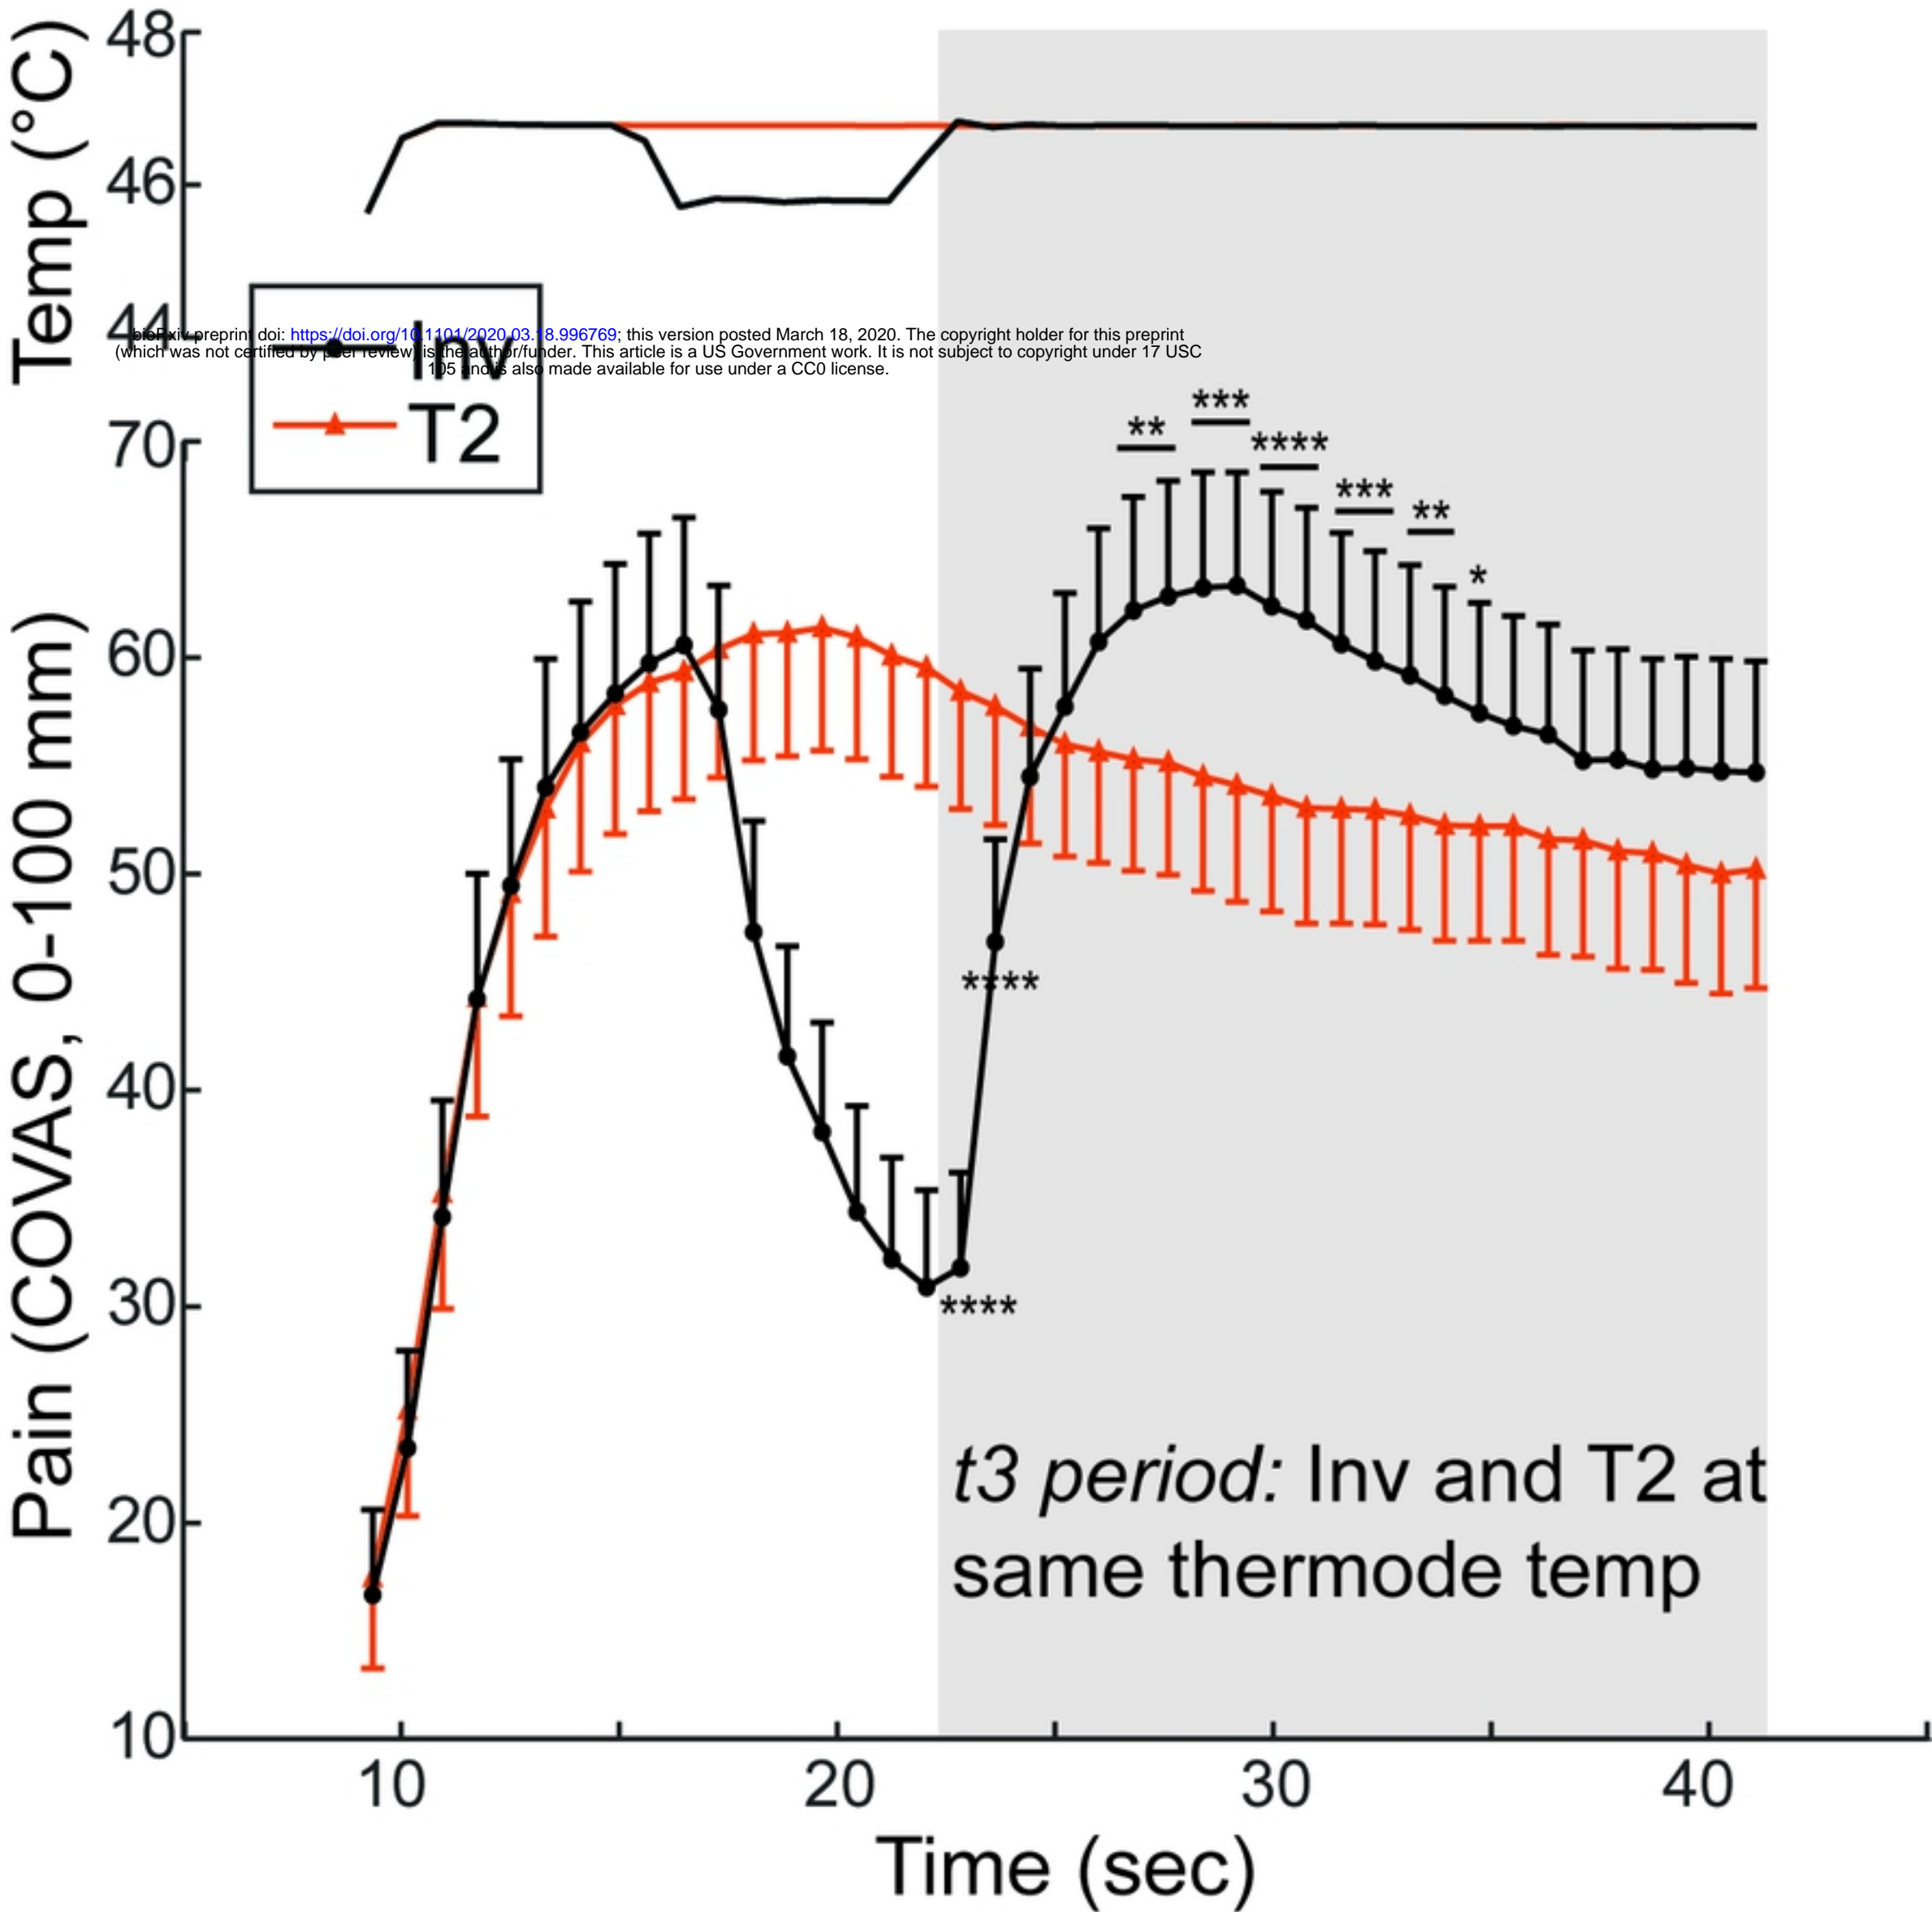

Figure2

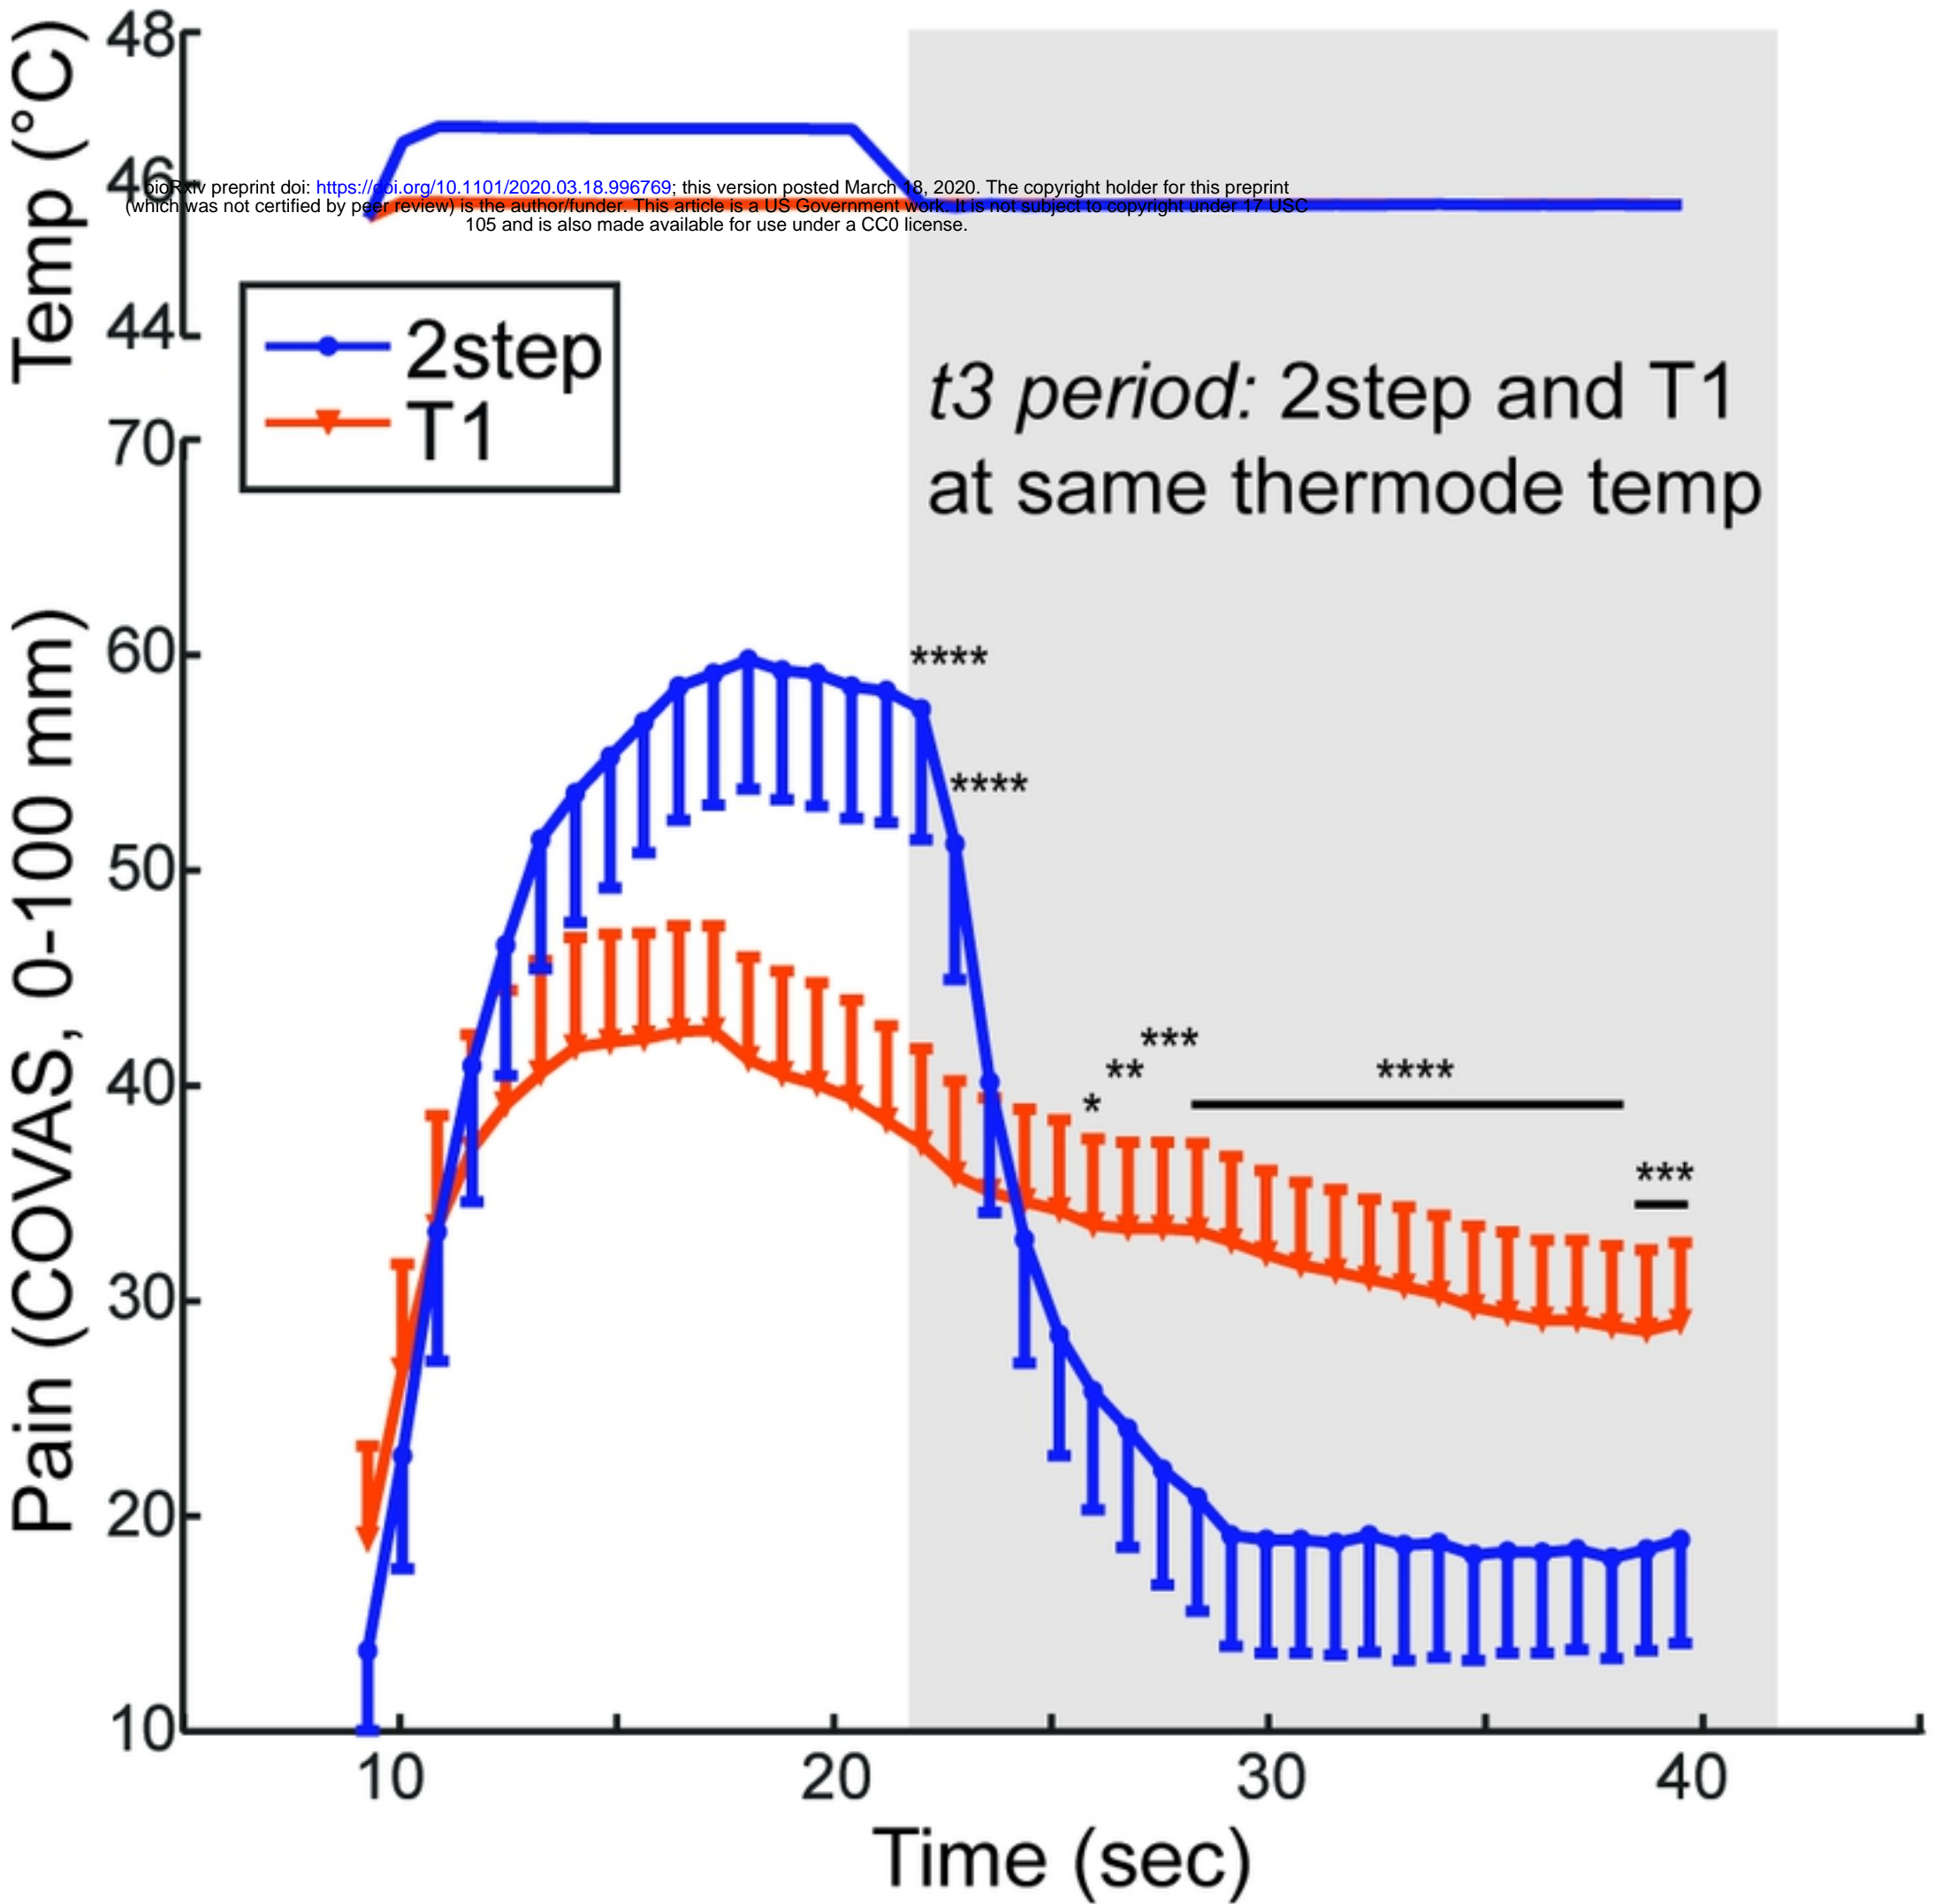

Figure3

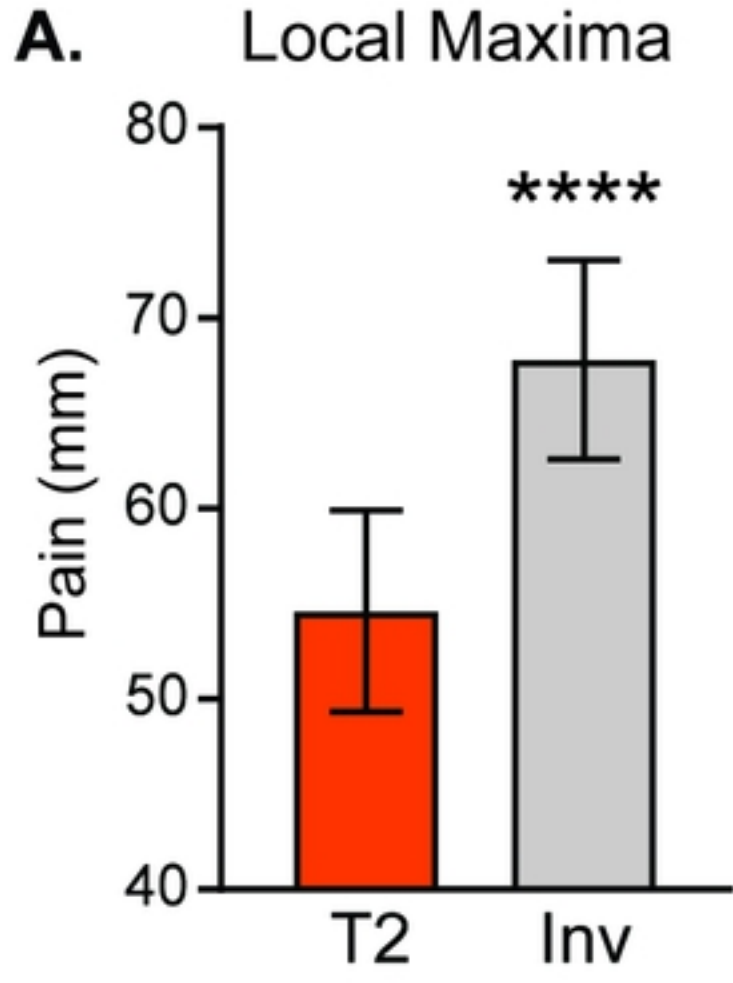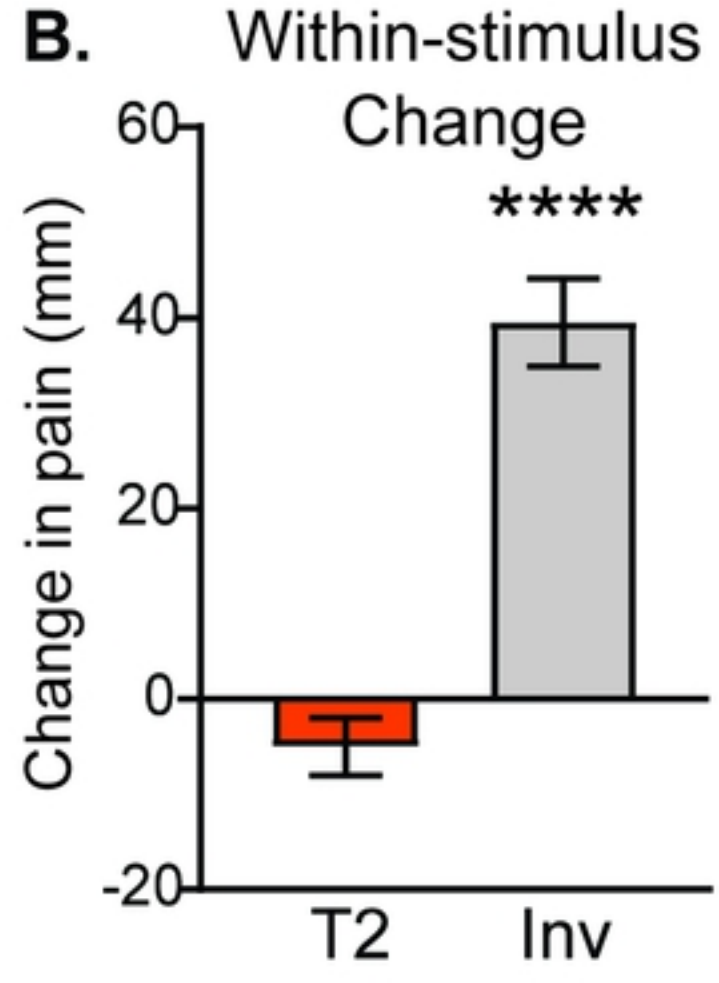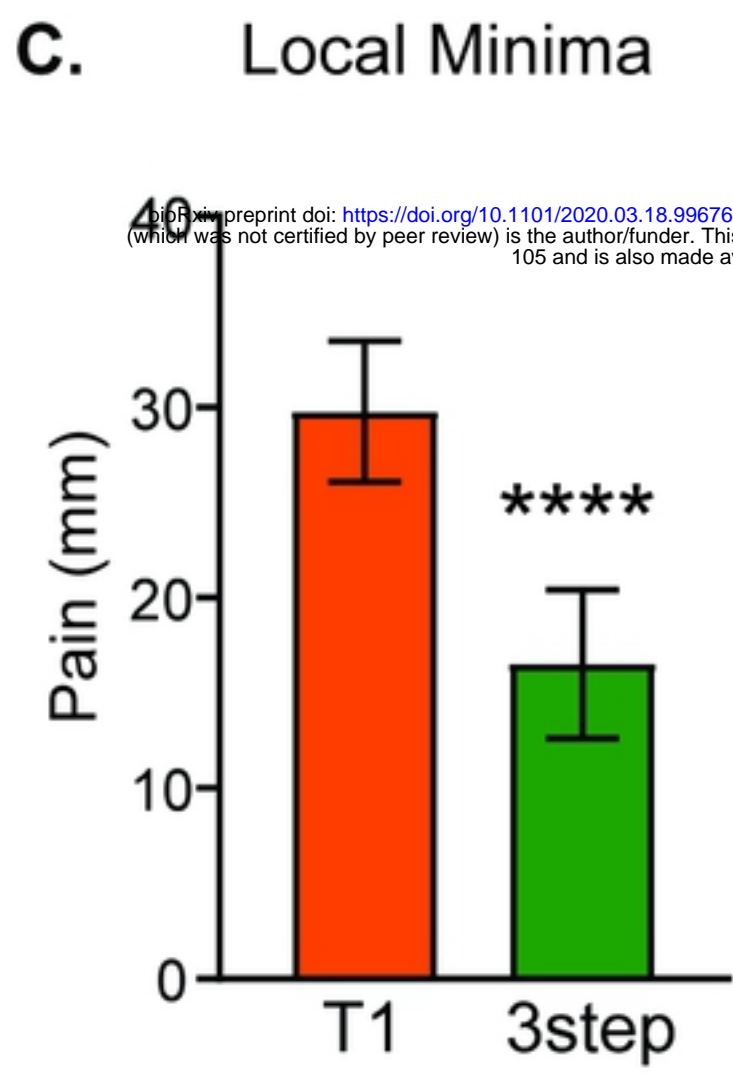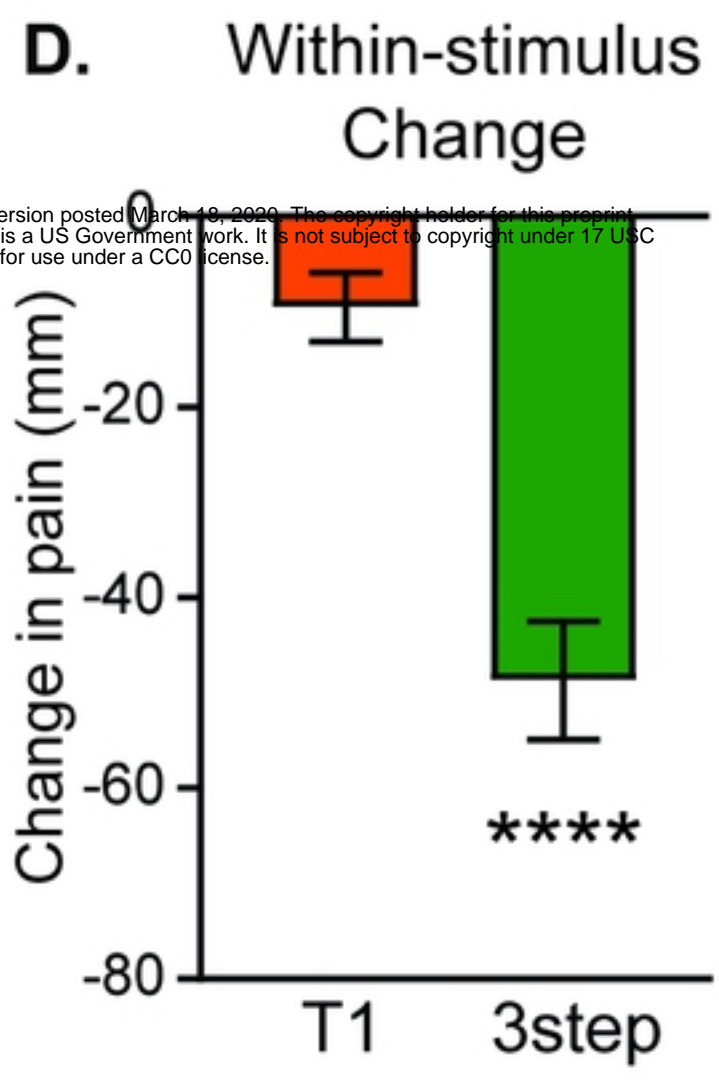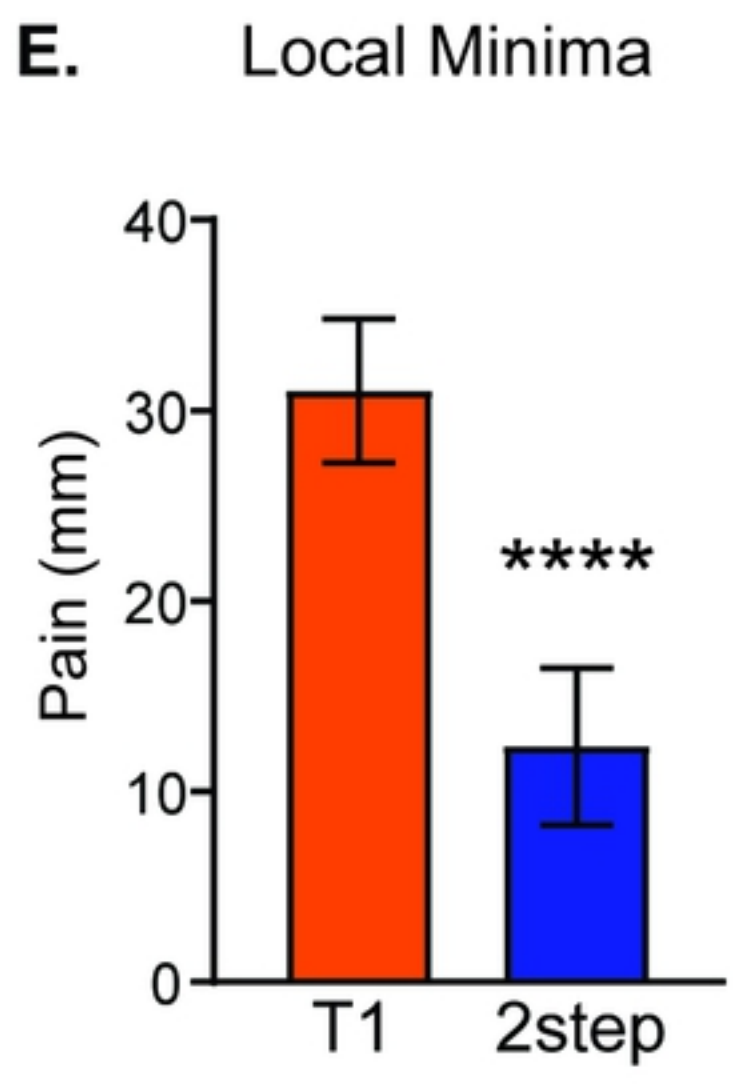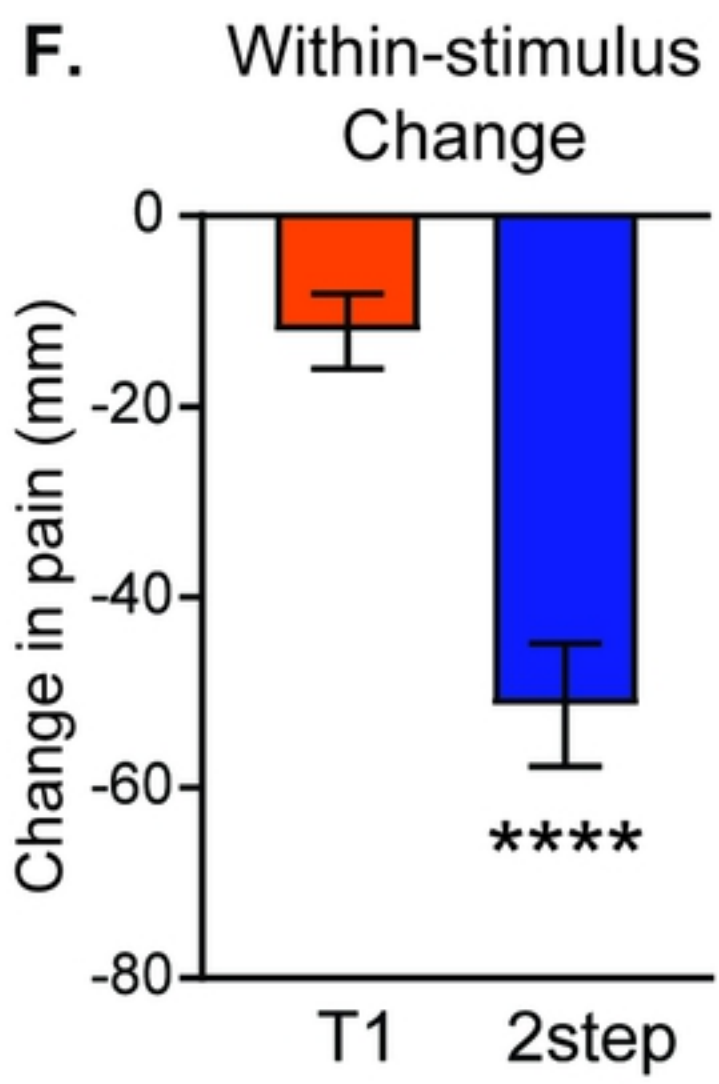

Figure 4

bioRxiv preprint doi: <https://doi.org/10.1101/2020.03.18.996769>; this version posted March 19, 2020. The copyright holder for this preprint (which was not certified by peer review) is the author/funder. This article is a US Government work. It is not subject to copyright under 17 USC 105 and is also made available for use under a CC0 license.

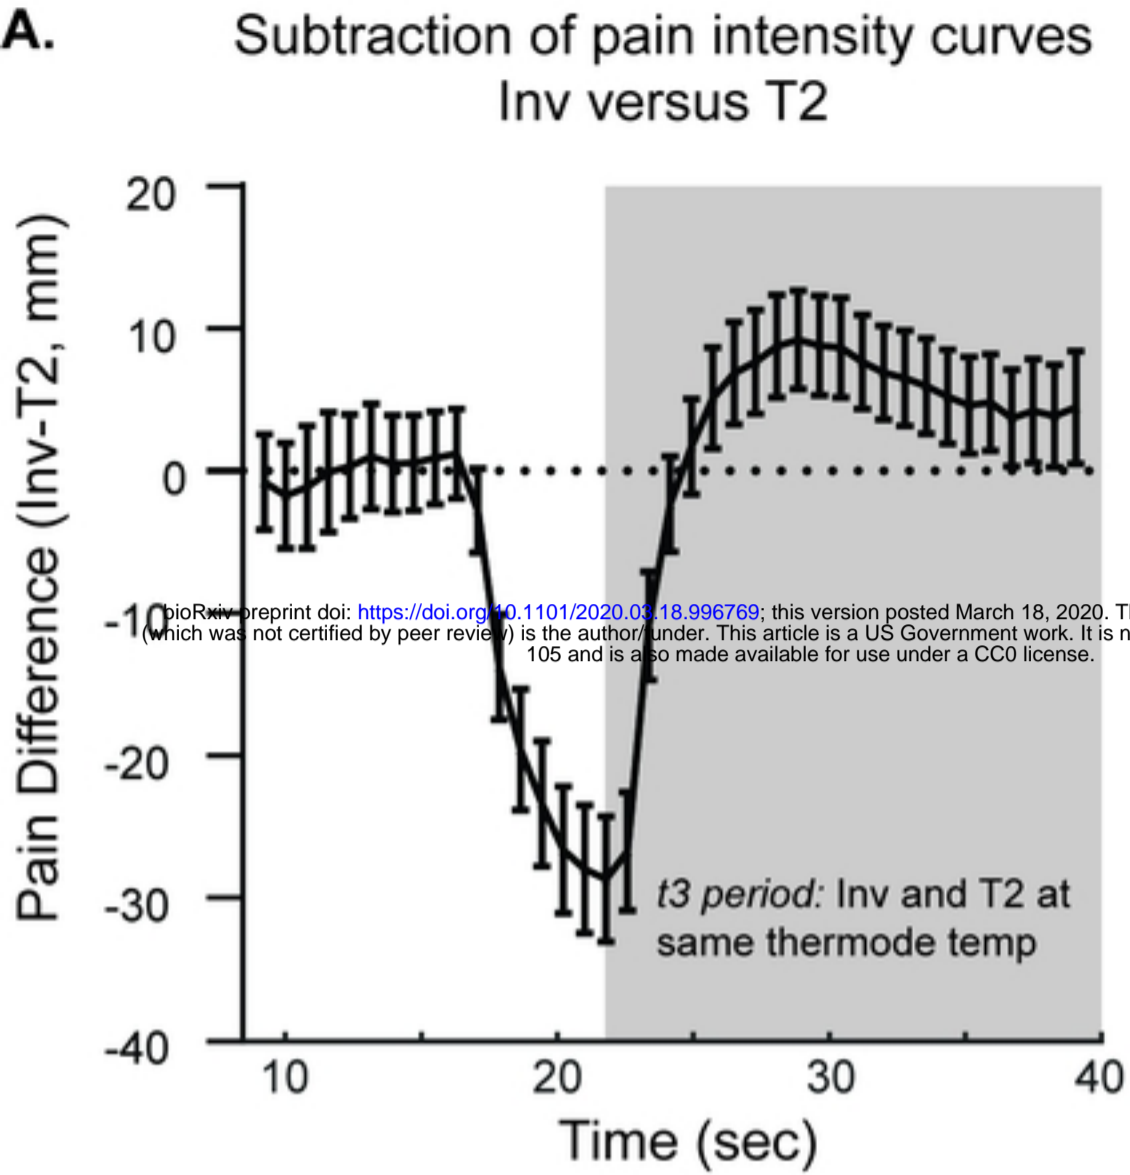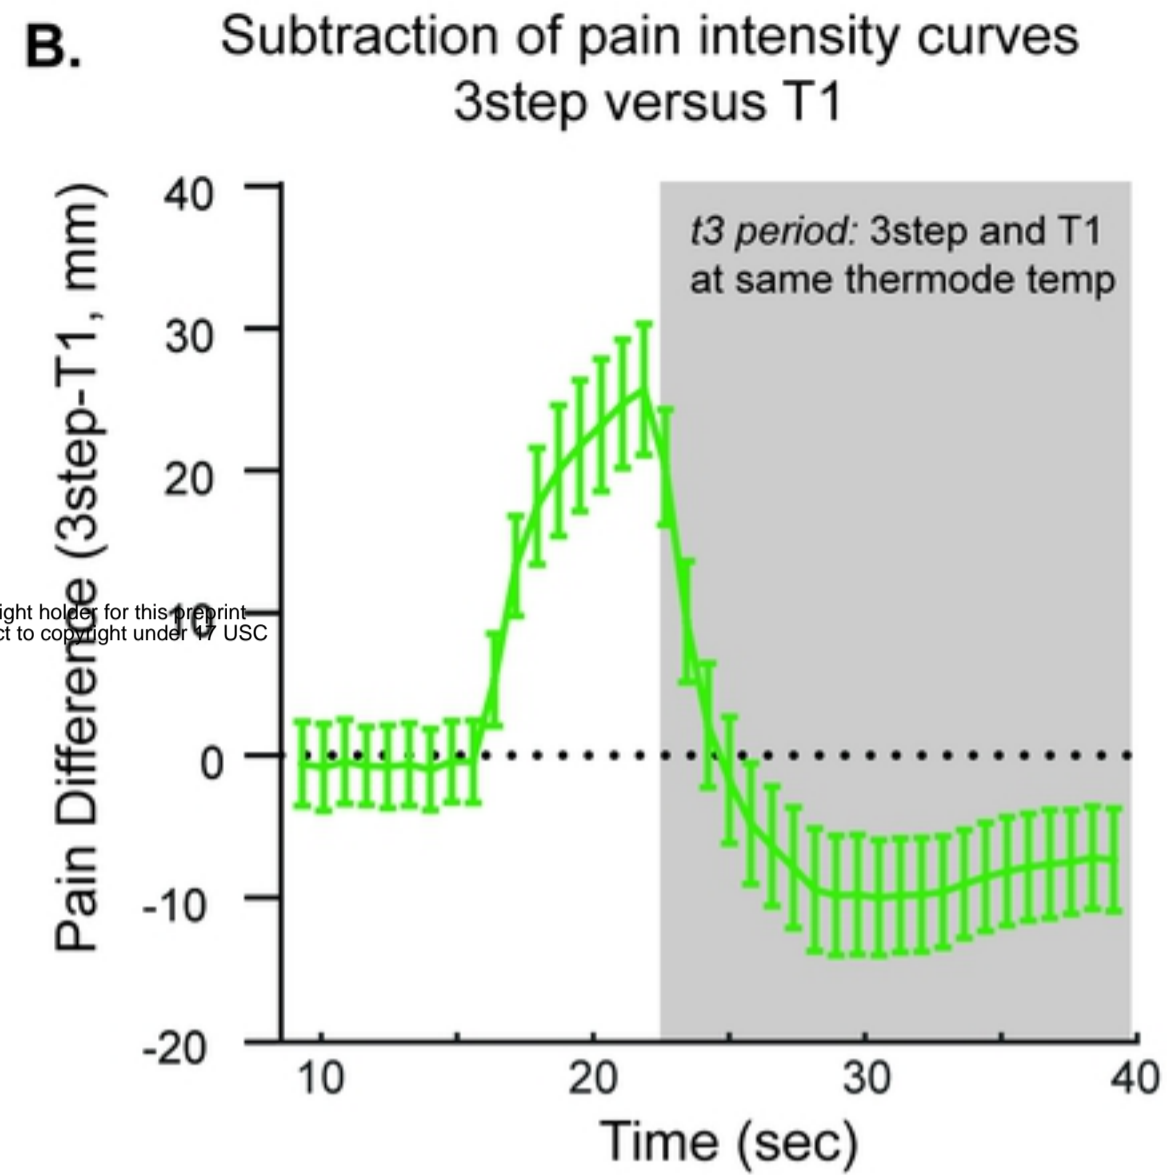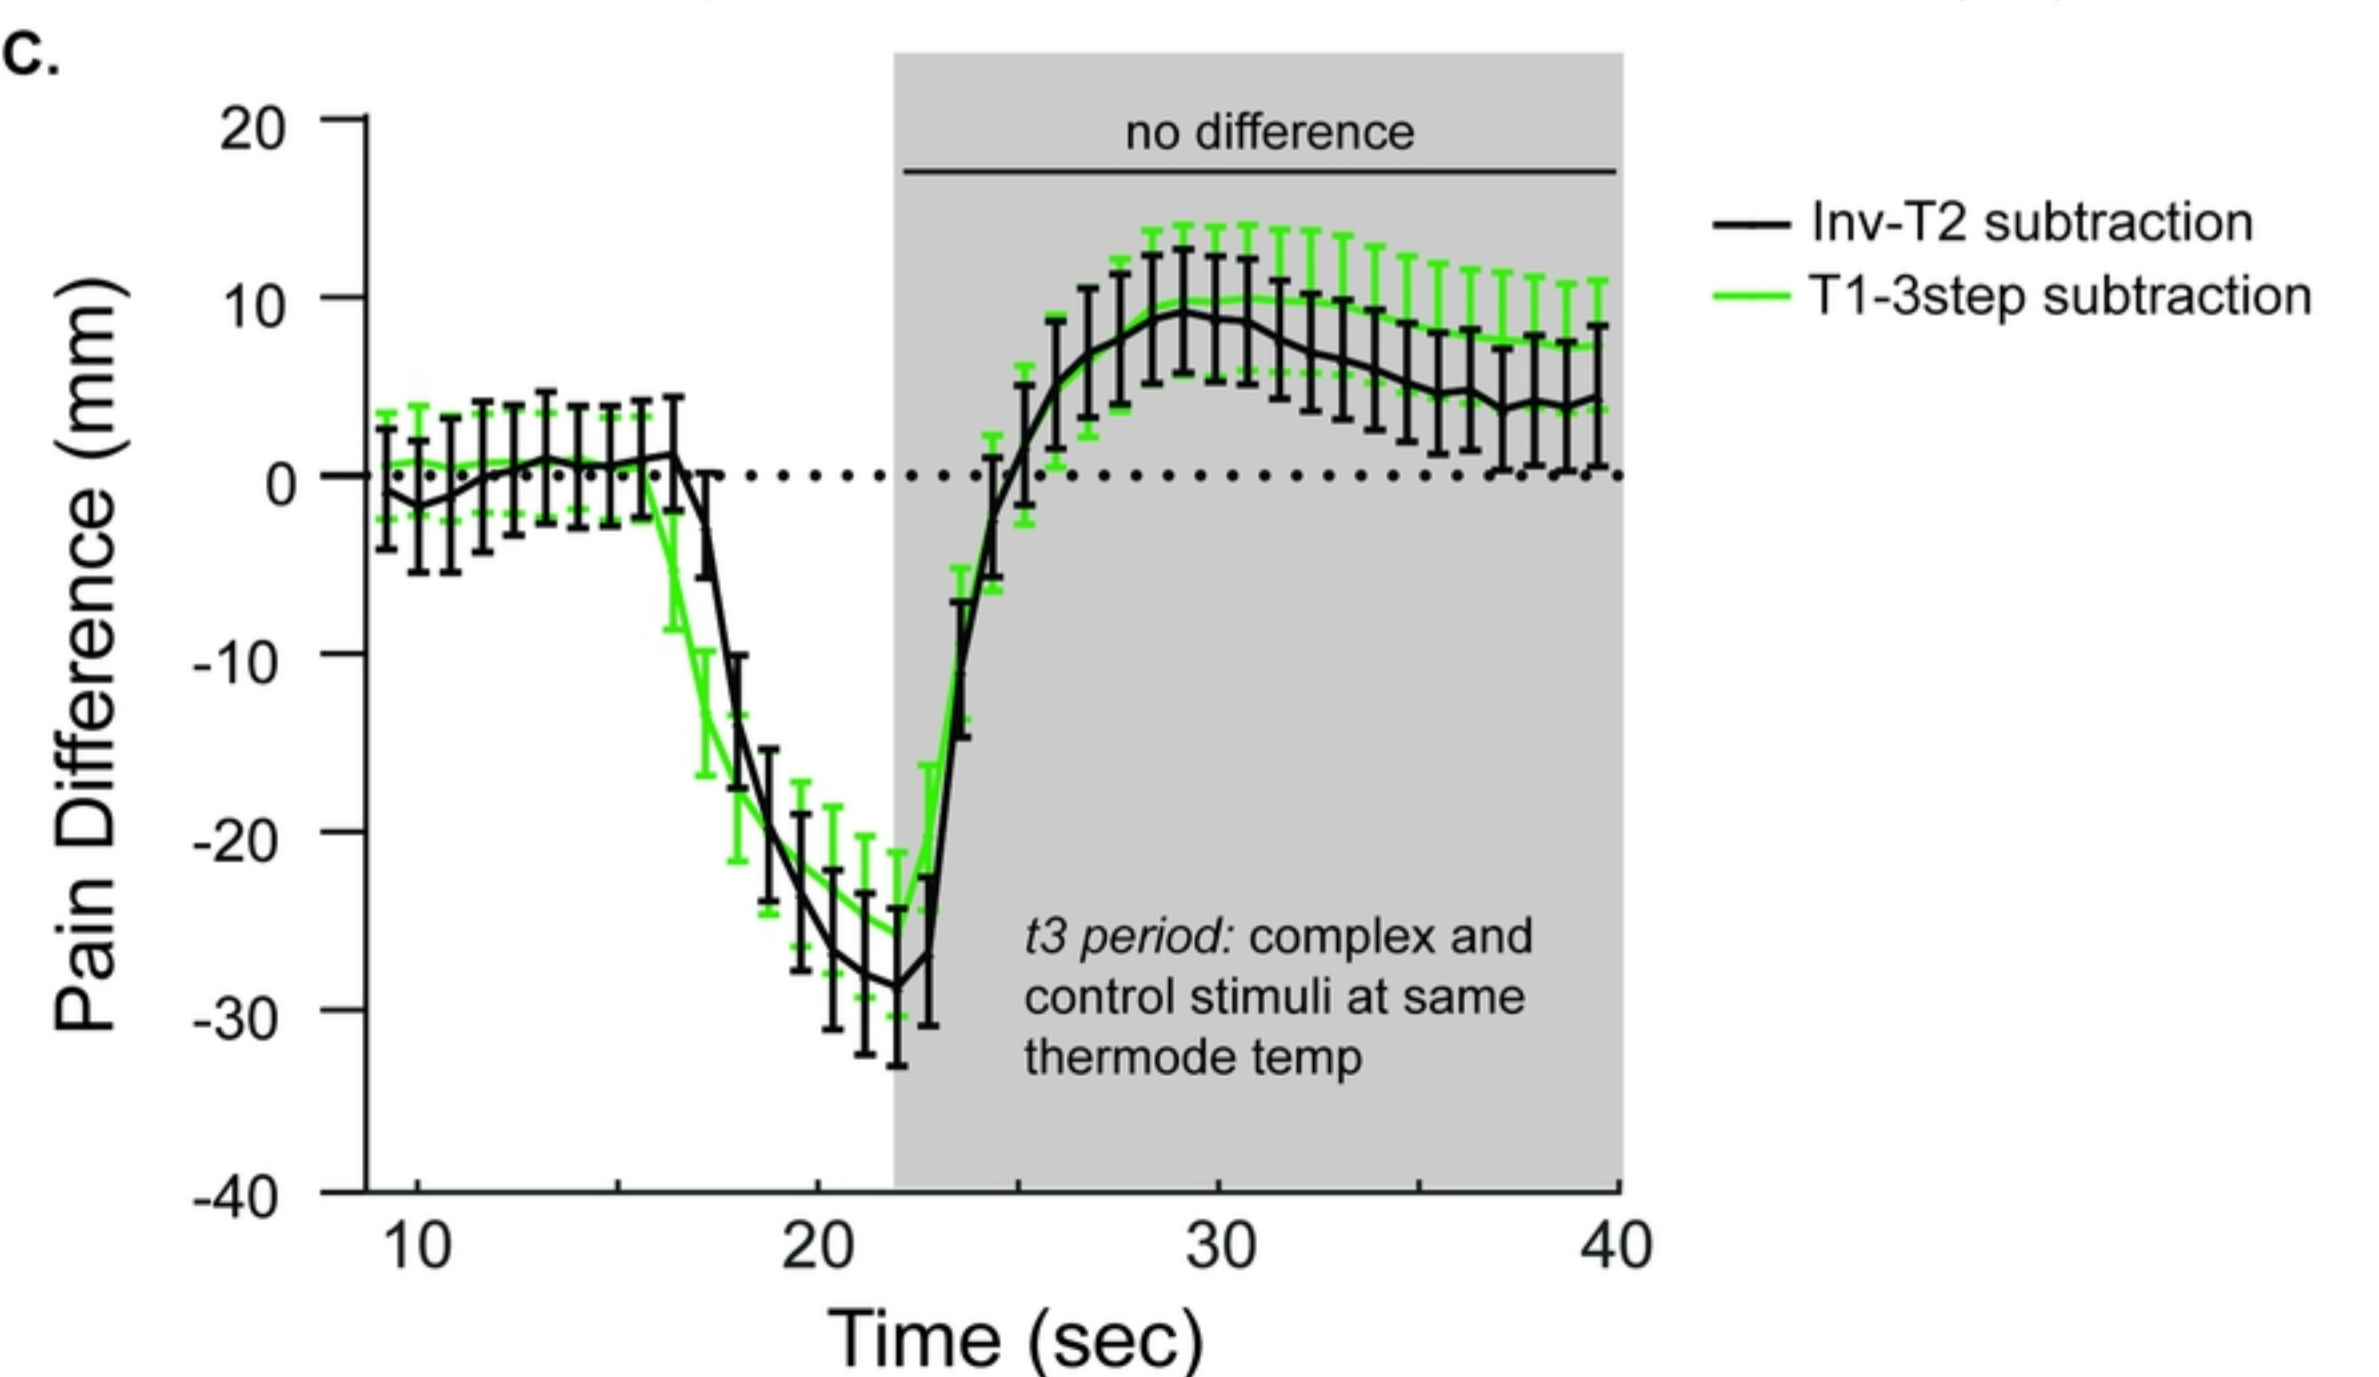

Figure5



**A.** Local extrema of complex stimuli

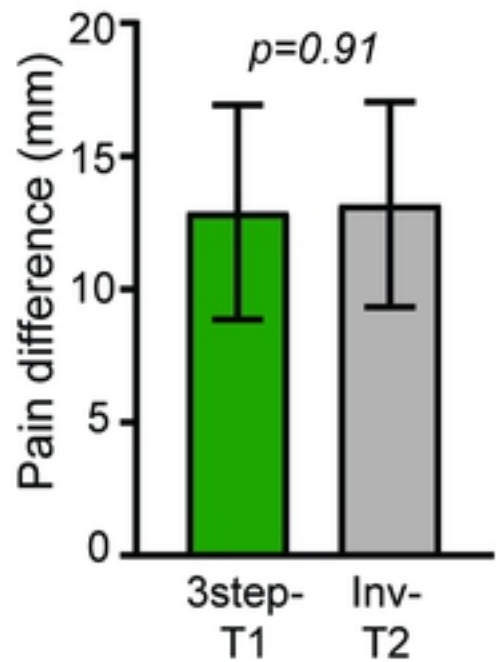

**B.** Within-stimulus change (max-min)

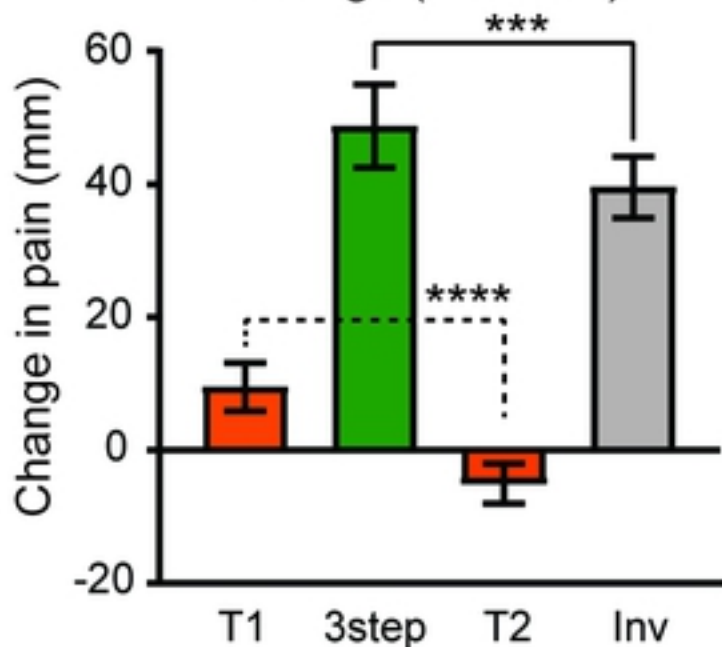

**C.** Difference curves

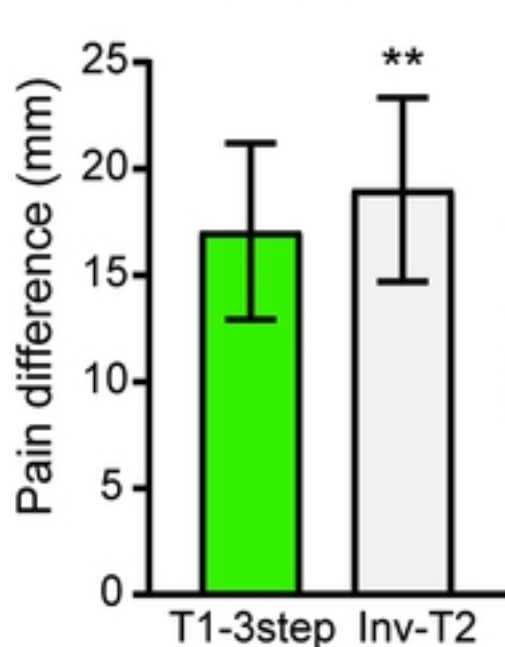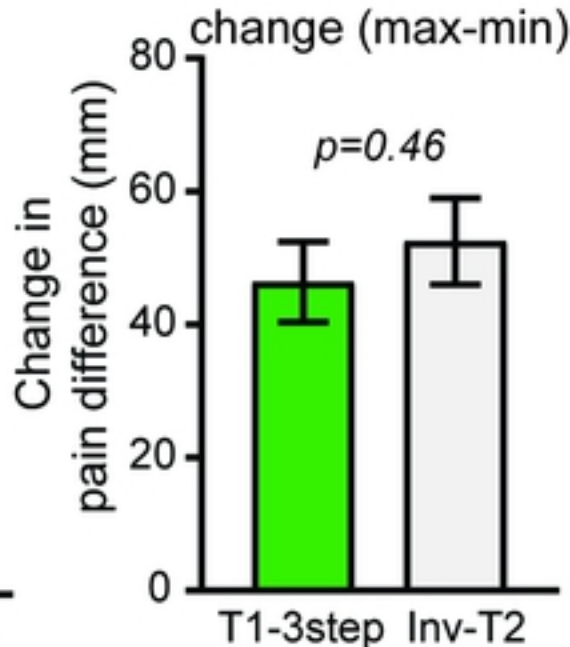

Figure 6

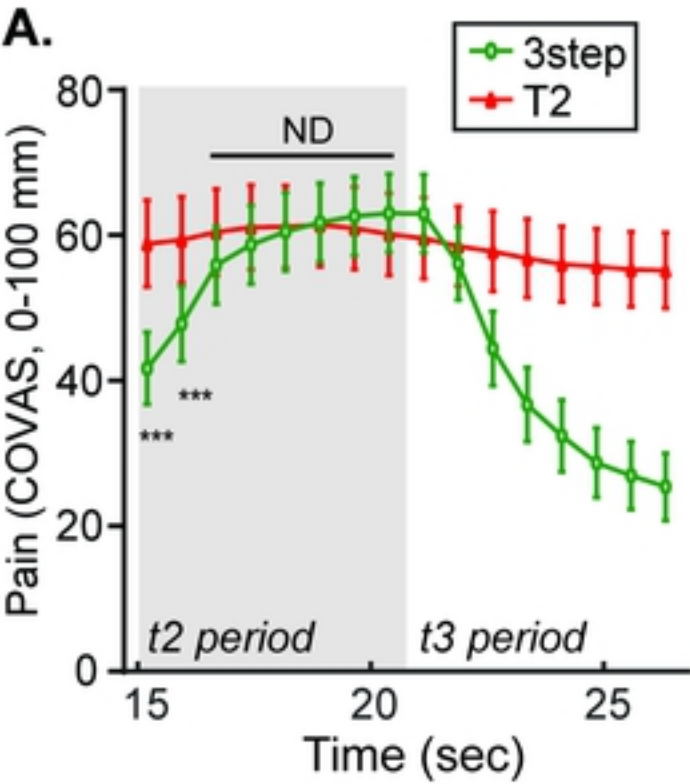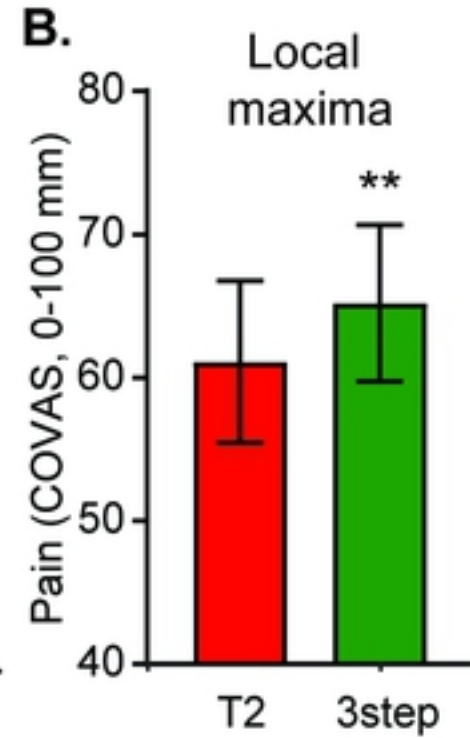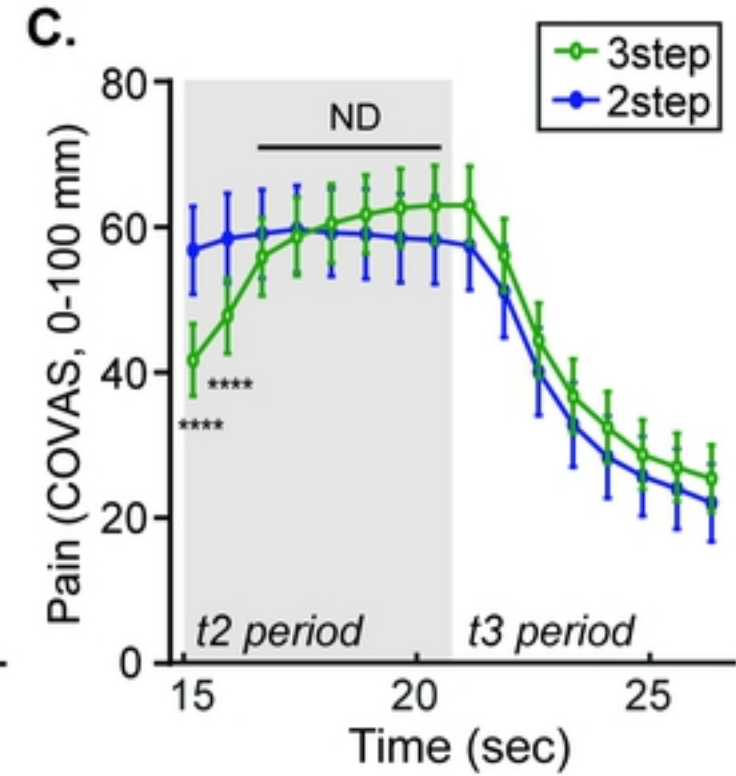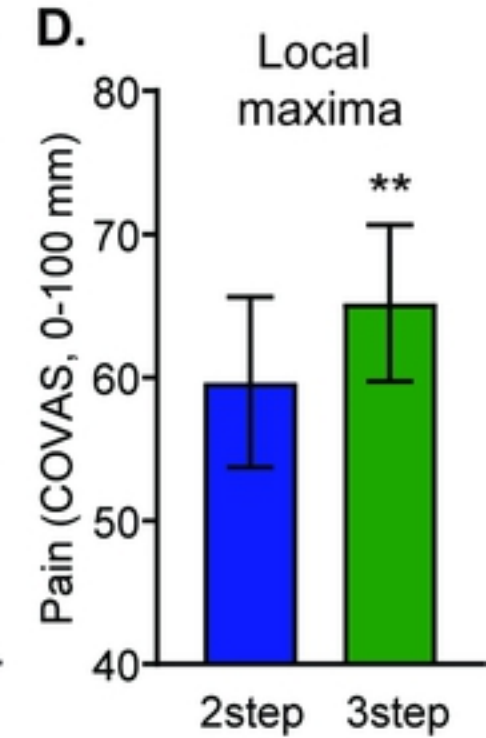

Figure 7

**A.**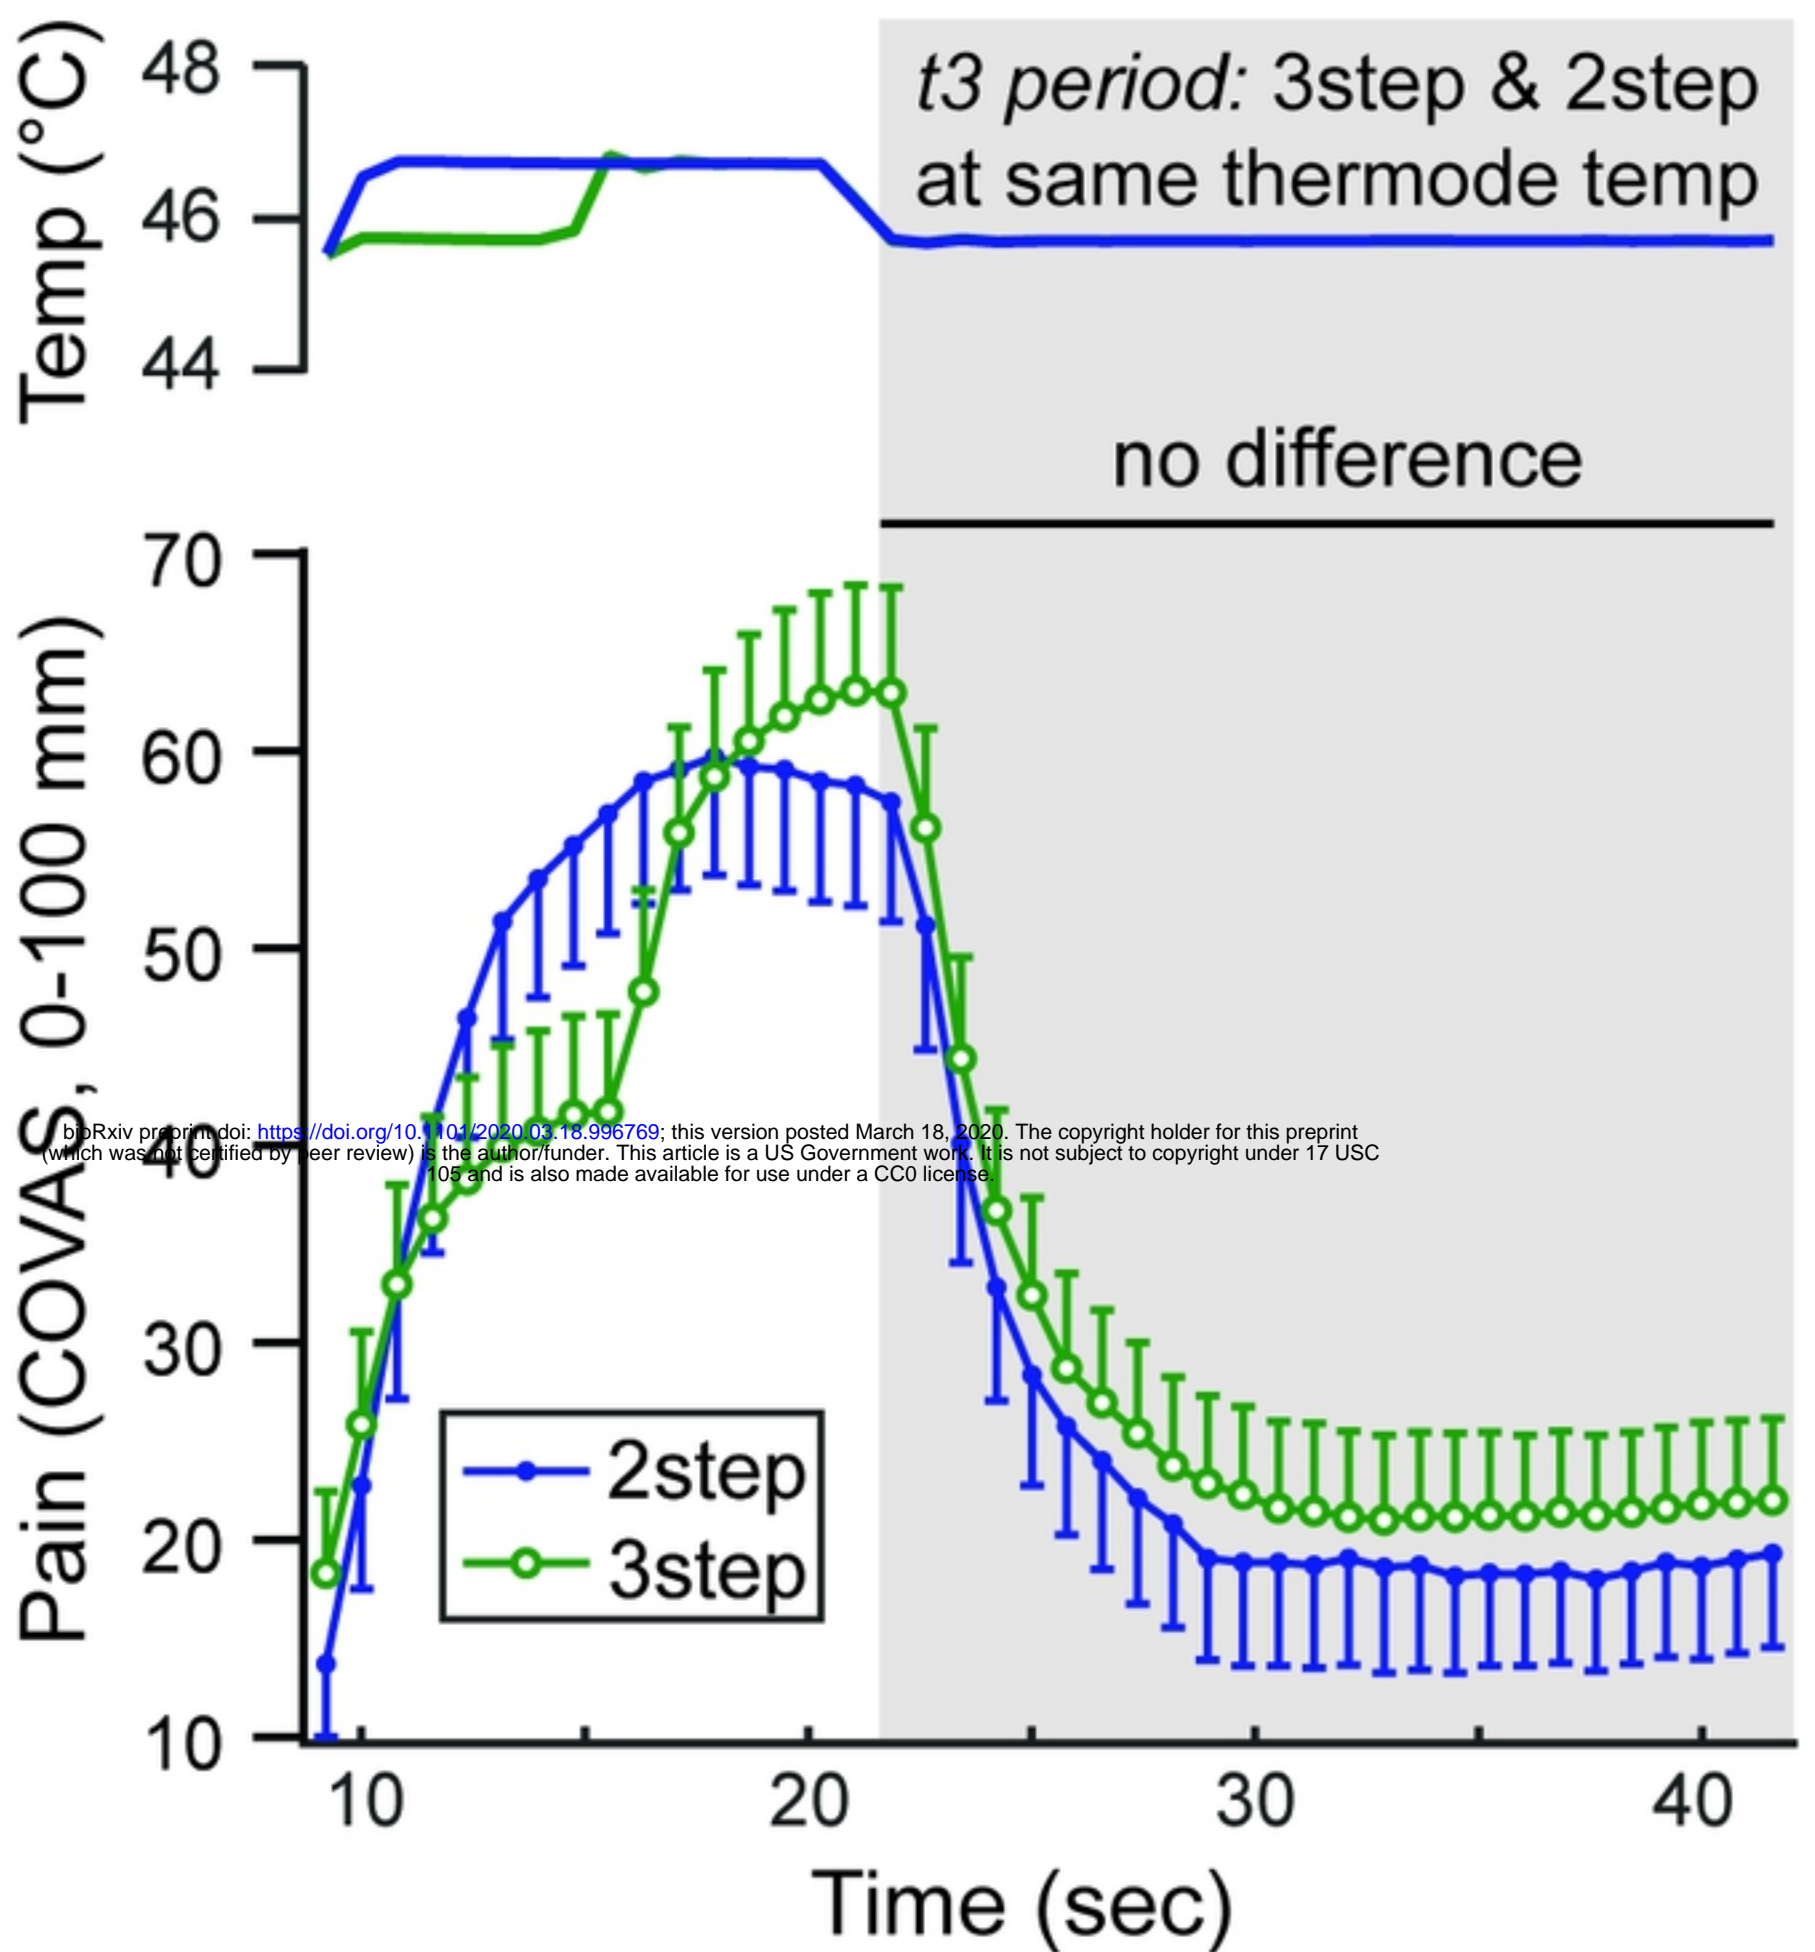**B.**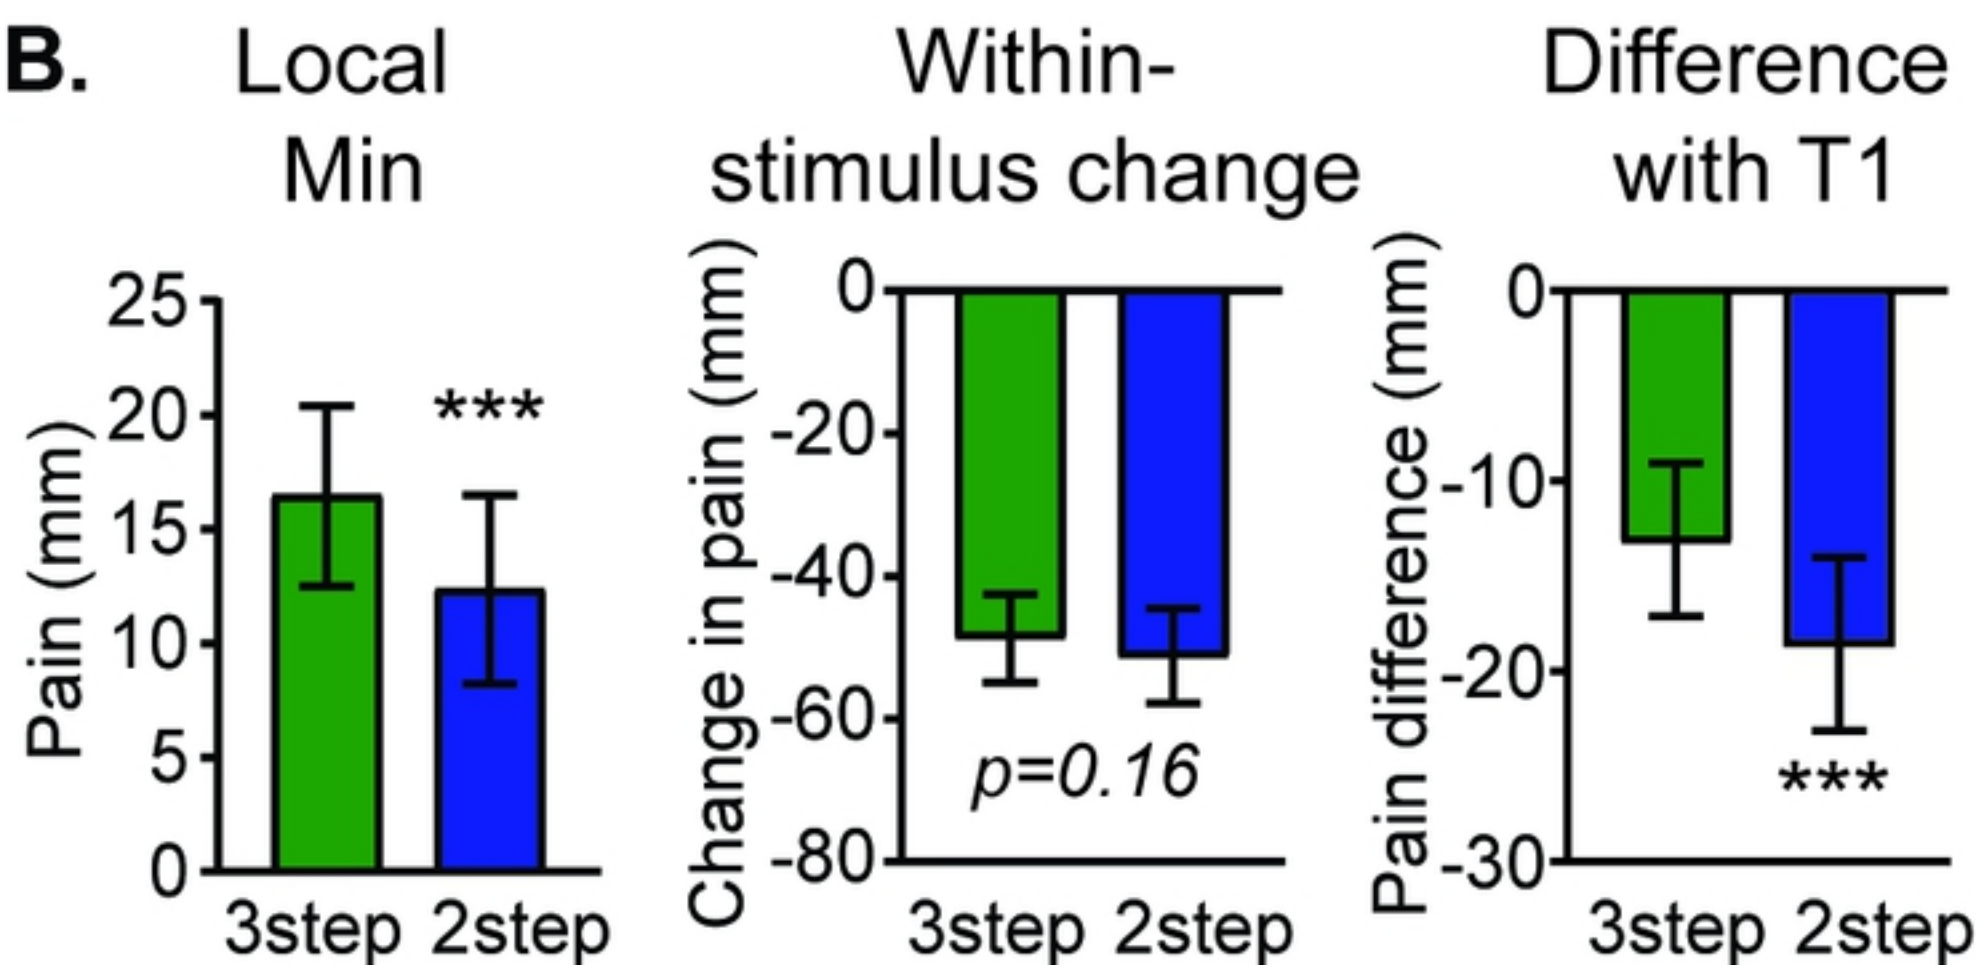

Figure 8

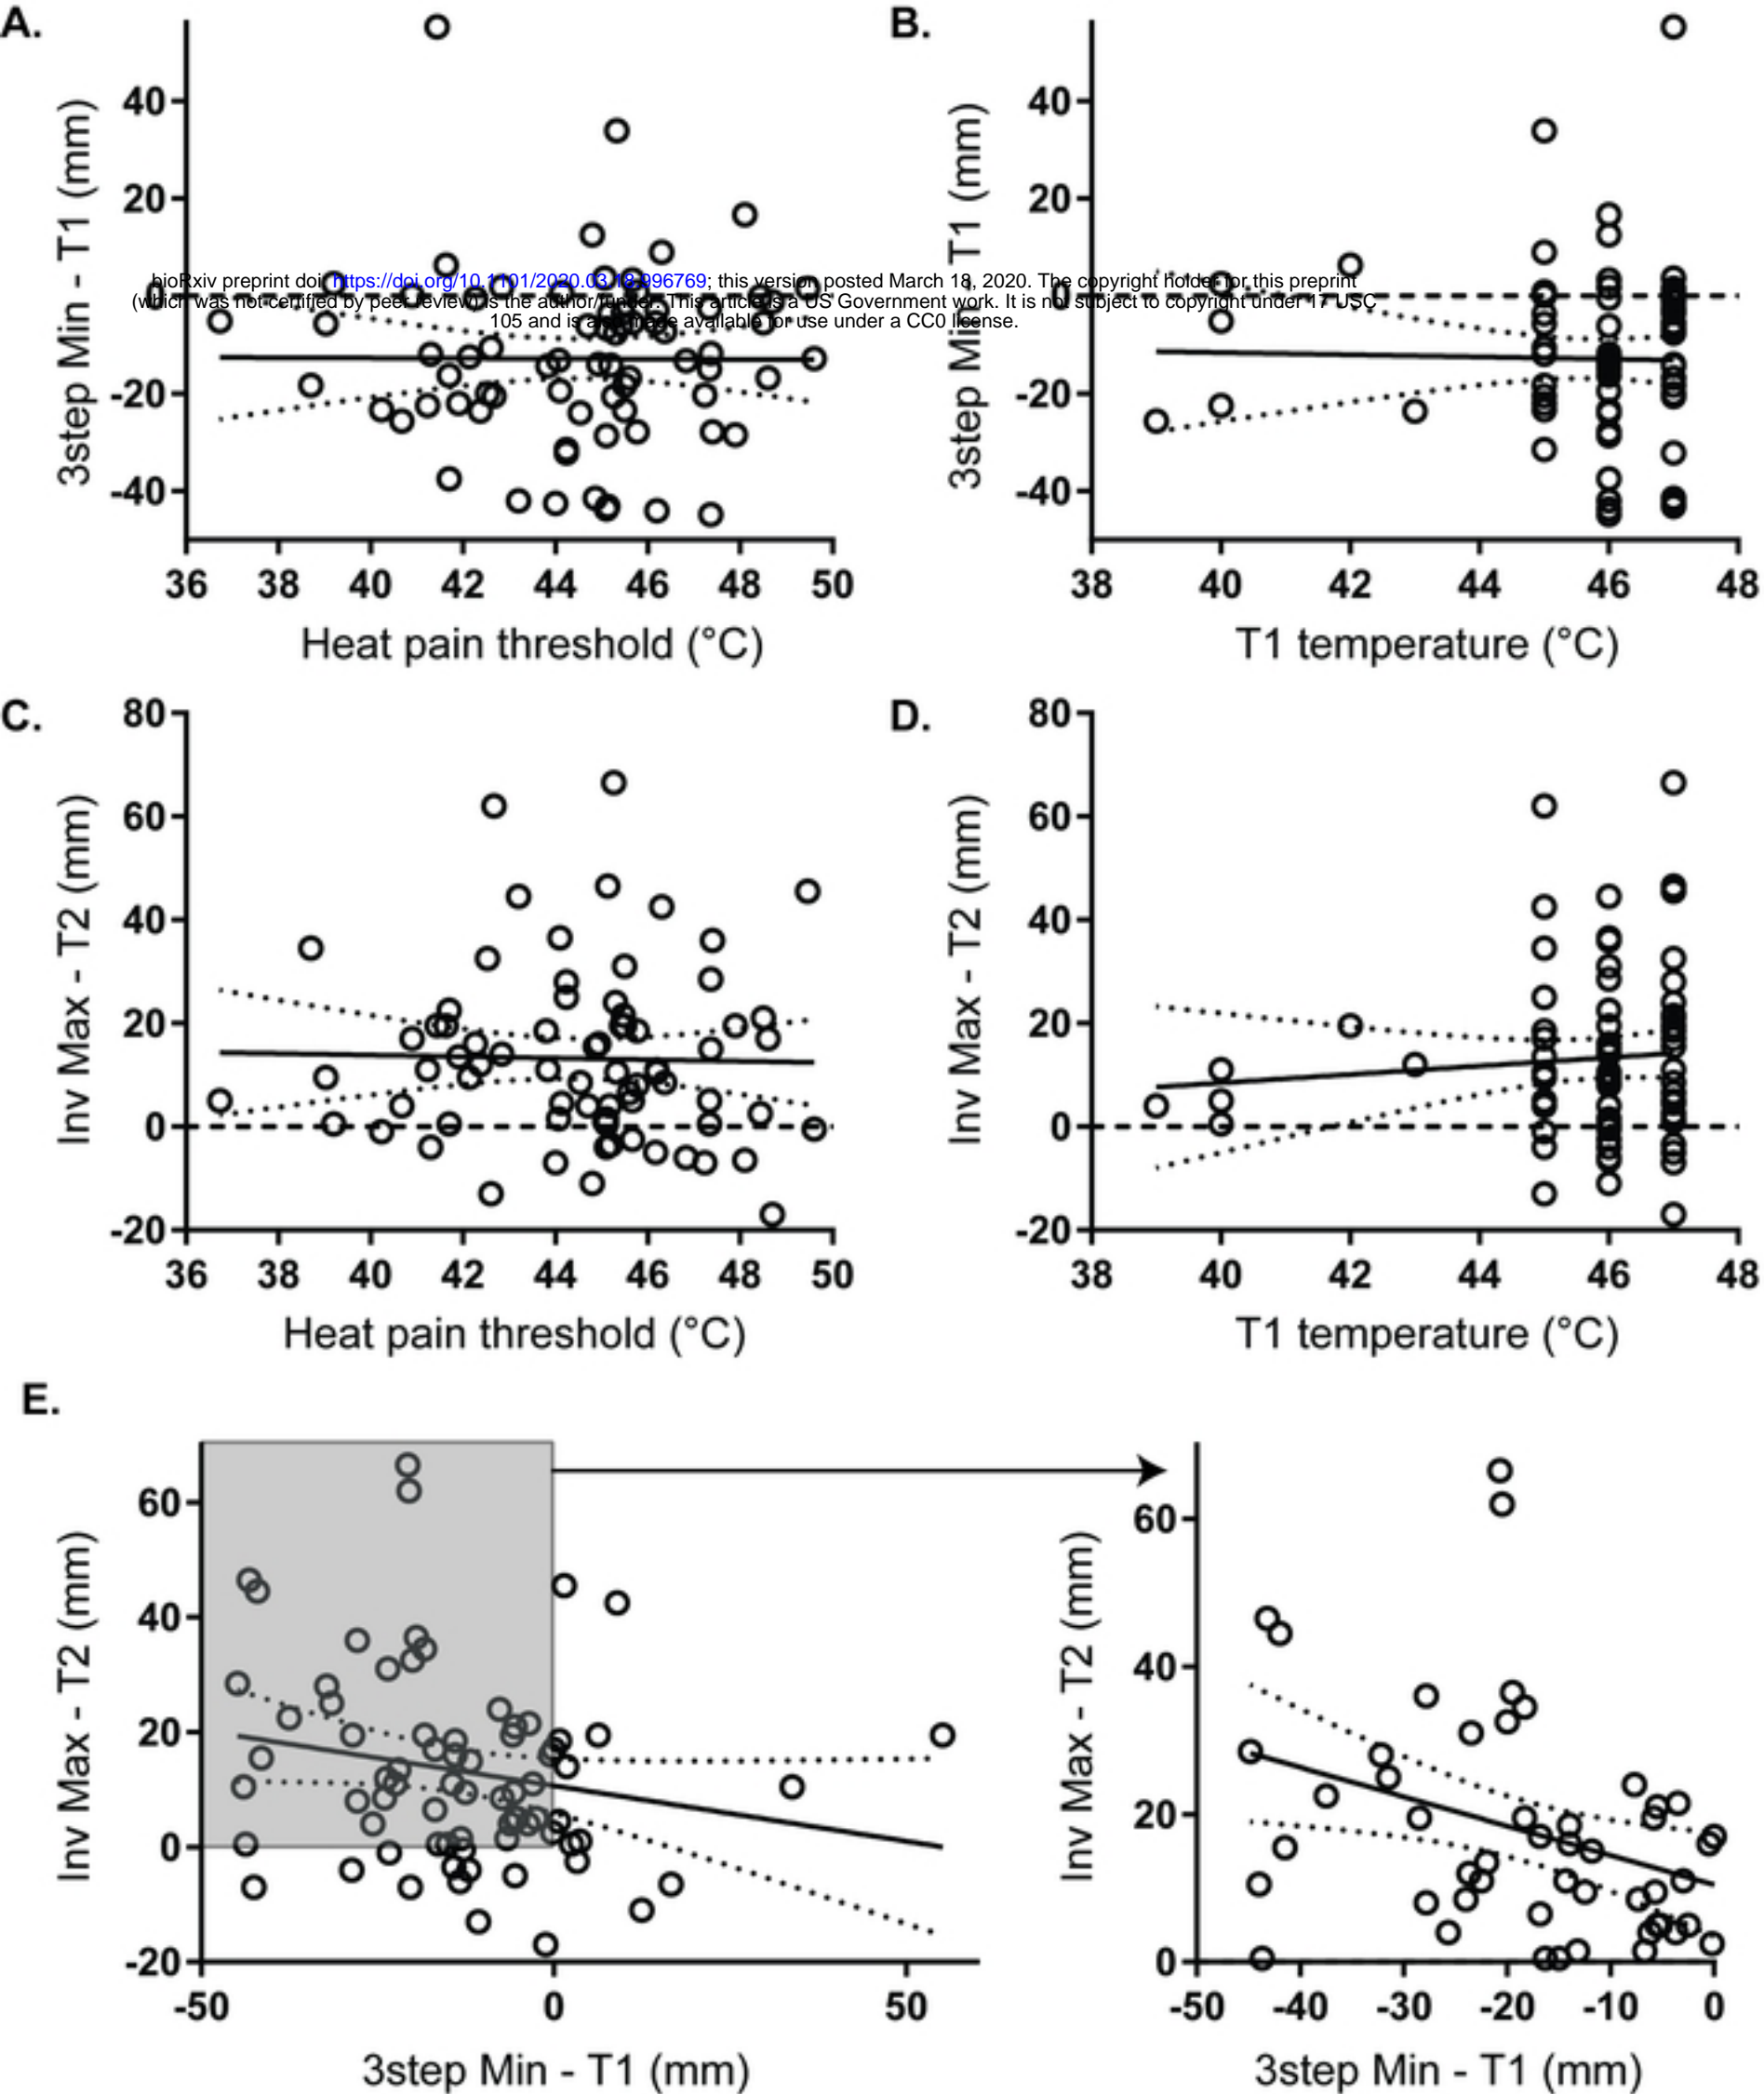

Figure9
